# Supplementary material for: Prenatal vitamin intake in first month of pregnancy and DNA methylation in cord blood and placenta in two prospective cohorts
Source: Epigenetics Chromatin. 2022 Aug 2;15:28. doi: 10.1186/s13072-022-00460-9 (PMC9344645; doi:10.1186/s13072-022-00460-9)
Supplement: Supplementary file 6 — Additional file 6. Supplemental Table 6. Gene ontology ranking by p-value for EARLI placenta, EARLI cord blood, MARBLES placenta, and MARBLES cord blood, ordered by rank sum across the four cohort/tissue groups. [file 13072_2022_460_MOESM6_ESM.csv]

path	marb.cord	marb.plac	earl.cord	earl.plac	sum
behavior	33	29	41	137	240
nervous system development	718	8	1	8	735
axon development	255	282	368	13	918
regulation of synaptic plasticity	116	313	122	434	985
synapse organization	760	25	285	42	1112
neurogenesis	1125	5	18	32	1180
cell morphogenesis involved in differentiation	424	35	671	121	1251
neuron differentiation	1218	3	17	39	1277
axonogenesis	149	270	884	11	1314
neuron development	1257	1	178	35	1471
central nervous system development	742	67	348	320	1477
eating behavior	1069	162	104	260	1595
cognition	30	146	197	1286	1659
cell morphogenesis involved in neuron differentiation	663	54	975	46	1738
generation of neurons	1726	10	16	23	1775
import into cell	165	394	513	767	1839
neuron recognition	56	716	686	443	1901
long-term synaptic potentiation	282	363	869	408	1922
learning or memory	54	334	214	1376	1978
anatomical structure morphogenesis	1163	471	175	169	1978
adult behavior	611	186	640	608	2045
glutamate receptor signaling pathway	666	408	772	234	2080
cell-cell adhesion	1192	330	297	293	2112
cell development	1458	39	526	119	2142
feeding behavior	1259	68	94	738	2159
cellular component morphogenesis	690	84	1571	183	2528
neuron projection morphogenesis	1021	16	1447	155	2639
regionalization	555	1874	19	244	2692
cell projection morphogenesis	933	21	1529	214	2697
animal organ morphogenesis	726	789	210	1113	2838
peripheral nervous system development	1004	469	530	861	2864
synaptic signaling	2813	18	35	31	2897
modulation of chemical synaptic transmission	2523	76	166	138	2903
plasma membrane bounded cell projection morphogenesis	1015	20	1676	193	2904
regulation of trans-synaptic signaling	2584	80	135	141	2940
cell part morphogenesis	677	43	2109	142	2971
system development	2620	393	2	2	3017
trans-synaptic signaling	3007	15	21	27	3070
axon guidance	1375	795	842	135	3147
neuron projection guidance	1472	862	665	151	3150
pattern specification process	1900	1300	73	81	3354
nervous system process	1631	49	1172	524	3376
regulation of neuron differentiation	882	47	922	1608	3459
negative regulation of neuron projection development	203	346	2761	178	3488
forebrain development	2153	515	109	731	3508
brain development	756	33	282	2551	3622
membrane depolarization during action potential	162	1209	1389	884	3644
chemical synaptic transmission	3584	12	28	21	3645
anterograde trans-synaptic signaling	3585	13	29	22	3649
neuron fate commitment	19	1414	155	2110	3698
regulation of neuronal synaptic plasticity	2331	459	570	358	3718
spinal cord motor neuron cell fate specification	291	1124	852	1508	3775
cell fate specification	207	132	30	3420	3789
neuron projection development	3392	2	356	122	3872
cell-cell signaling	3141	547	196	54	3938
collateral sprouting	725	1331	1101	787	3944
pituitary gland development	334	3375	14	240	3963
spinal cord development	1435	1017	779	762	3993
head development	576	79	218	3138	4011
cation transport	1681	23	1766	631	4101
animal organ development	3176	912	44	91	4223
neuron fate specification	28	112	153	4020	4313
multicellular organism development	4074	263	15	9	4361
spinal cord association neuron differentiation	627	2722	182	842	4373
regulation of heart rate by cardiac conduction	852	2324	669	748	4593
iodide transport	1049	351	341	2923	4664
calcium ion transmembrane import into cytosol	1500	1122	2008	51	4681
dorsal spinal cord development	530	3739	253	184	4706
dermatome development	1055	632	1935	1145	4767
regulation of dermatome development	1056	633	1936	1146	4771
sensory perception of mechanical stimulus	2108	1838	279	590	4815
cell fate determination	2434	1953	322	112	4821
optic nerve morphogenesis	654	822	939	2426	4841
skeletal system morphogenesis	322	2277	476	1778	4853
adenylate cyclase-inhibiting G protein-coupled receptor signaling pathway	1619	303	1241	1715	4878
regulation of collateral sprouting	368	3653	252	612	4885
regulation of feeding behavior	99	3011	314	1467	4891
response to cocaine	498	1090	2053	1313	4954
membrane depolarization during cardiac muscle cell action potential	1346	843	870	1927	4986
cell morphogenesis	1378	94	2629	1004	5105
vocalization behavior	1036	448	247	3484	5215
spinal cord motor neuron differentiation	2819	184	301	1969	5273
cell recognition	458	93	3787	960	5298
cation transmembrane transport	453	87	4348	416	5304
positive regulation of epithelial cell differentiation involved in kidney development	561	3316	940	490	5307
neural precursor cell proliferation	407	4363	329	231	5330
female genitalia development	2272	1481	397	1190	5340
anatomical structure development	5057	203	93	14	5367
inositol trisphosphate metabolic process	2778	1043	1139	446	5406
potassium ion homeostasis	66	1921	2095	1380	5462
cell differentiation in spinal cord	2327	301	105	2753	5486
G protein-coupled receptor signaling pathway, coupled to cyclic nucleotide second messenger	1170	91	3950	312	5523
metal ion homeostasis	2082	102	2564	809	5557
sensory organ development	52	612	25	4891	5580
embryonic limb morphogenesis	20	2209	68	3300	5597
embryonic appendage morphogenesis	21	2210	69	3301	5601
dopamine uptake involved in synaptic transmission	865	1142	3467	156	5630
catecholamine uptake involved in synaptic transmission	866	1143	3468	157	5634
central nervous system neuron differentiation	3175	1949	413	101	5638
startle response	800	4592	108	167	5667
adenylate cyclase-modulating G protein-coupled receptor signaling pathway	3202	138	144	2229	5713
regulation of cell size	280	1954	1970	1562	5766
multicellular organismal homeostasis	332	671	3408	1402	5813
positive regulation of long-term synaptic potentiation	171	562	3690	1398	5821
COP9 signalosome assembly	115	3556	1425	736	5832
negative regulation of neuron differentiation	1214	1260	527	2860	5861
cell junction organization	2297	1980	860	751	5888
tissue development	519	4266	726	414	5925
negative regulation of axonogenesis	146	2544	1328	1920	5938
positive regulation of G protein-coupled receptor signaling pathway	1697	2603	880	772	5952
cellular response to monoamine stimulus	74	1636	3860	387	5957
cellular response to catecholamine stimulus	75	1637	3861	388	5961
detection of temperature stimulus involved in sensory perception	1283	1731	2135	827	5976
regulation of biological quality	1129	341	2831	1696	5997
inorganic cation transmembrane transport	758	266	4602	375	6001
inorganic ion transmembrane transport	1305	212	4306	194	6017
renal tubule development	602	587	3925	910	6024
sensory perception of sound	3255	2030	162	578	6025
regulation of extent of cell growth	248	3474	1534	774	6030
somite development	163	3531	2108	229	6031
forebrain cell migration	4069	1373	146	452	6040
visual behavior	283	1847	2236	1690	6056
inorganic ion homeostasis	1539	117	3968	457	6081
regulation of nervous system development	1460	69	2648	1933	6110
myoblast fusion	1770	284	2623	1444	6121
renal tubule morphogenesis	2402	589	2544	593	6128
cation homeostasis	1843	187	3429	677	6136
peripheral nervous system neuron differentiation	982	2103	561	2492	6138
peripheral nervous system neuron development	983	2104	562	2493	6142
synapse assembly	5747	209	221	16	6193
regulation of kidney size	1059	236	1046	3857	6198
learning	379	1176	84	4589	6228
social behavior	3081	486	22	2647	6236
neuropeptide signaling pathway	5021	106	1069	52	6248
ear development	385	3111	45	2738	6279
neuromuscular process	4188	546	600	969	6303
muscle structure development	3164	199	1342	1653	6358
positive regulation of receptor internalization	1035	2751	2330	257	6373
biological adhesion	4331	4	995	1055	6385
calcium ion transport into cytosol	2191	1971	2136	128	6426
organic cation transport	2690	404	1497	1856	6447
myoblast fusion involved in skeletal muscle regeneration	1100	90	1153	4123	6466
telencephalon cell migration	3459	1559	187	1273	6478
neuron apoptotic process	960	1534	3012	996	6502
nephron tubule development	737	637	3279	1906	6559
ion transmembrane transport	1974	439	3784	436	6633
adenohypophysis development	2184	2790	26	1658	6658
nephron epithelium development	1355	342	3476	1505	6678
regulation of developmental growth	16	573	3974	2122	6685
nephric duct morphogenesis	545	4612	61	1489	6707
regulation of neurogenesis	1321	83	1973	3333	6710
regulation of neurotransmitter uptake	2887	320	3363	173	6743
protein localization to postsynaptic specialization membrane	2732	2137	954	940	6763
neurotransmitter receptor localization to postsynaptic specialization membrane	2733	2138	955	941	6767
nerve development	2004	622	1967	2180	6773
segmentation	1368	4965	275	172	6780
locomotion	4953	55	220	1677	6905
ion homeostasis	1193	88	4698	949	6928
respiratory system process	857	2063	2672	1338	6930
inner ear development	811	2039	276	3806	6932
negative regulation of cell projection organization	543	930	5298	211	6982
somitogenesis	497	5605	725	188	7015
cell adhesion	4660	7	1280	1074	7021
sodium ion transmembrane transport	433	3117	637	2847	7034
neuron cell-cell adhesion	1455	887	250	4443	7035
cell differentiation	4852	1422	765	7	7046
regulation of membrane potential	4141	663	826	1424	7054
regulation of dopamine uptake involved in synaptic transmission	2832	725	3477	24	7058
regulation of catecholamine uptake involved in synaptic transmission	2833	726	3478	25	7062
sensory perception of temperature stimulus	653	1828	2529	2081	7091
locomotory behavior	151	352	596	6026	7125
muscle contraction	2560	442	3927	215	7144
positive regulation of synaptic transmission	6089	85	830	190	7194
heart contraction	3025	2792	682	718	7217
nerve growth factor signaling pathway	3521	127	3447	144	7239
sensory system development	45	737	174	6290	7246
negative regulation of fibroblast migration	103	3506	1258	2379	7246
membrane depolarization during AV node cell action potential	594	810	3435	2438	7277
response to methylmercury	215	1163	5726	179	7283
embryonic skeletal system development	296	3386	359	3267	7308
endothelial cell morphogenesis	316	4469	1761	779	7325
regulation of postsynaptic membrane neurotransmitter receptor levels	3425	1934	766	1205	7330
cell fate commitment	357	2928	42	4025	7352
mammary gland epithelial cell differentiation	858	1187	1568	3757	7370
regulation of inositol trisphosphate biosynthetic process	2193	2198	2745	253	7389
regulation of eating behavior	1187	1785	1588	2830	7390
vasodilation	1880	331	4447	763	7421
behavioral response to cocaine	1437	860	4859	286	7442
developmental process	6769	542	148	20	7479
embryonic morphogenesis	547	2494	11	4436	7488
negative regulation of behavior	994	4464	152	1901	7511
visual system development	59	816	358	6279	7512
membrane depolarization	1225	932	699	4672	7528
ventral spinal cord development	4190	495	62	2829	7576
multicellular organismal signaling	5823	706	754	300	7583
membrane biogenesis	2133	3005	261	2190	7589
negative regulation of feeding behavior	2491	2224	923	1962	7600
positive regulation of B cell proliferation	1694	190	2678	3041	7603
positive regulation of cytosolic calcium ion concentration	4323	142	2891	254	7610
positive regulation of epidermal cell differentiation	1134	3050	1880	1555	7619
positive regulation of epithelial cell differentiation	743	5280	316	1312	7651
regulation of neurotransmitter receptor localization to postsynaptic specialization membrane	1534	3475	1833	814	7656
sodium ion transport	2030	3811	439	1388	7668
transmembrane transport	3766	194	3226	498	7684
catecholamine uptake	894	750	6024	26	7694
vagina development	4617	2302	565	221	7705
actin filament-based movement	507	1208	106	5892	7713
kidney epithelium development	1590	223	3996	1911	7720
neurotransmitter uptake	4578	1590	1336	226	7730
ammonium transport	216	297	4300	2925	7738
sleep	1948	3014	549	2240	7751
negative regulation of cell differentiation	753	2758	833	3408	7752
membrane assembly	2774	1978	151	2871	7774
prepulse inhibition	975	4602	365	1837	7779
negative regulation of transcription by competitive promoter binding	53	275	664	6792	7784
calcium ion transmembrane transport via high voltage-gated calcium channel	228	924	5246	1389	7787
anatomical structure arrangement	1420	661	886	4823	7790
neuron migration	2392	164	4828	435	7819
glial cell differentiation	2747	2245	1817	1062	7871
regulation of developmental process	1399	2618	3222	669	7908
regulation of axon extension	1289	1983	3124	1514	7910
response to ethanol	1944	280	2234	3460	7918
regulation of semaphorin-plexin signaling pathway	664	2357	989	3972	7982
neuron fate determination	2576	1022	4350	34	7982
eye development	73	1065	312	6545	7995
regulation of multicellular organismal process	1371	666	4243	1722	8002
positive regulation of glucose transmembrane transport	3572	728	2506	1217	8023
diencephalon development	170	7580	67	216	8033
ectoderm development	977	2042	1708	3308	8035
negative regulation of developmental growth	1250	1778	2565	2447	8040
cardiac muscle contraction	2704	1940	1282	2135	8061
heart process	3745	2410	1028	881	8064
regulation of epidermal cell differentiation	27	5072	91	2875	8065
movement of cell or subcellular component	4242	153	128	3558	8081
camera-type eye development	213	1079	136	6690	8118
AV node cell action potential	2976	2132	1119	1899	8126
negative regulation of collateral sprouting	777	4925	352	2076	8130
AV node cell to bundle of His cell signaling	2977	2133	1120	1900	8130
neuron death	2312	1638	3259	925	8134
negative regulation of neurogenesis	1767	1647	346	4396	8156
chemoattraction of axon	940	1299	1325	4608	8172
dorsal/ventral pattern formation	922	6589	47	624	8182
positive regulation of potassium ion transmembrane transport	5916	911	919	442	8188
cellular potassium ion homeostasis	2903	1670	3217	401	8191
nephron development	2198	1680	2116	2201	8195
release of sequestered calcium ion into cytosol	1583	1037	5489	96	8205
cellular biogenic amine metabolic process	128	1841	5025	1223	8217
natural killer cell cytokine production	3603	974	3549	94	8220
regulation of natural killer cell cytokine production	3604	975	3550	95	8224
cardiac muscle cell contraction	1859	3747	119	2539	8264
establishment of body hair or bristle planar orientation	728	3750	86	3704	8268
establishment of body hair planar orientation	729	3751	87	3705	8272
regulation of AMPA receptor activity	1936	28	206	6110	8280
associative learning	738	1485	1816	4244	8283
cellular developmental process	5245	2255	784	10	8294
appendage morphogenesis	13	2638	293	5351	8295
limb morphogenesis	14	2639	294	5352	8299
regulation of endothelial cell migration	4284	2248	321	1481	8334
nephron tubule morphogenesis	3624	1096	2557	1072	8349
sensory perception of pain	1765	727	4492	1377	8361
cerebral cortex neuron differentiation	1295	641	6316	118	8370
cell-cell signaling involved in cardiac conduction	4609	2831	244	690	8374
negative regulation of amine transport	931	2979	1604	2863	8377
negative regulation of cell development	1409	1211	727	5031	8378
peptidyl-tyrosine dephosphorylation	3806	2303	524	1751	8384
nephron epithelium morphogenesis	3982	839	2851	733	8405
glial cell development	536	451	6625	794	8406
neuronal ion channel clustering	185	3260	3186	1789	8420
regulation of transmembrane transport	2373	40	4383	1627	8423
memory	78	4293	416	3639	8426
detection of temperature stimulus involved in sensory perception of pain	731	1732	5535	449	8447
metal ion transport	5079	277	1202	1893	8451
response to monoamine	31	3158	4657	606	8452
response to catecholamine	32	3159	4658	607	8456
phosphatidylcholine biosynthetic process	1162	2321	626	4365	8474
negative regulation of nervous system development	2500	2468	246	3261	8475
muscle organ development	4746	964	623	2172	8505
regulation of ossification	803	3652	1794	2271	8520
camera-type eye morphogenesis	999	1864	116	5548	8527
dopamine uptake	2295	576	5698	18	8587
negative regulation of developmental process	2599	2848	889	2254	8590
regulation of cell-cell adhesion mediated by cadherin	1024	1437	636	5496	8593
calcium ion homeostasis	5048	96	2986	472	8602
morphogenesis of a polarized epithelium	488	6755	1005	383	8631
AV node cell to bundle of His cell communication	3376	2613	429	2238	8656
chemical homeostasis	2319	281	4174	1892	8666
calcium ion transmembrane transport	5016	397	3026	227	8666
cell migration	2922	145	1372	4231	8670
positive regulation of endothelial cell migration	3684	2948	1022	1018	8672
ventral spinal cord interneuron specification	706	571	4431	2975	8683
cell fate specification involved in pattern specification	707	572	4432	2976	8687
regulation of long-term synaptic potentiation	306	1975	4814	1641	8736
receptor clustering	2439	2128	319	3851	8737
cellular amine metabolic process	237	2490	4581	1436	8744
negative regulation of sequestering of calcium ion	1753	1322	5607	108	8790
retina development in camera-type eye	88	1324	1214	6173	8799
positive regulation of potassium ion transport	6153	844	1314	547	8858
regulation of potassium ion transport	3257	396	4381	838	8872
nephron morphogenesis	3582	771	3544	981	8878
regulation of epithelial cell migration	3841	583	753	3722	8899
mesodermal cell fate specification	5769	1147	1404	579	8899
action potential	1825	3618	1398	2069	8910
eye morphogenesis	1712	1520	385	5295	8912
regulation of release of sequestered calcium ion into cytosol	1345	1878	5521	170	8914
import across plasma membrane	697	5245	1359	1633	8934
proximal/distal pattern formation	236	1164	4405	3135	8940
positive regulation of mesenchymal to epithelial transition involved in metanephros morphogenesis	5464	741	1706	1029	8940
system process	4379	173	4281	113	8946
histone H3-K9 demethylation	1222	2341	1142	4253	8958
neuroblast proliferation	1180	5172	1330	1280	8962
regulation of cytosolic calcium ion concentration	5705	64	3082	114	8965
embryonic skeletal system morphogenesis	445	3980	234	4329	8988
somatic motor neuron differentiation	1505	126	2312	5075	9018
divalent inorganic cation homeostasis	4050	177	4369	424	9020
mature B cell differentiation involved in immune response	2855	1780	1360	3040	9035
localization within membrane	438	3993	3817	789	9037
substrate-independent telencephalic tangential migration	1793	1791	5430	66	9080
interneuron migration from the subpallium to the cortex	1794	1792	5431	67	9084
substrate-independent telencephalic tangential interneuron migration	1795	1793	5432	68	9088
inositol trisphosphate biosynthetic process	3864	398	4189	639	9090
detection of mechanical stimulus involved in sensory perception	3755	1757	2205	1399	9116
regulation of dendritic spine development	861	191	5261	2806	9119
regulation of cell migration	1356	328	251	7236	9171
clustering of voltage-gated sodium channels	463	4189	2771	1749	9172
actin-mediated cell contraction	1688	2642	158	4692	9180
urogenital system development	3820	1698	1460	2206	9184
calcium ion transport	5336	225	2746	883	9190
sensory perception	5308	859	1156	1871	9194
sensory organ morphogenesis	1574	1454	23	6145	9196
choline transport	1457	595	4282	2872	9206
cardiac muscle cell action potential	3333	4621	266	987	9207
regulation of ion transport	4641	14	2642	1914	9211
hexose transmembrane transport	6435	208	872	1703	9218
regulation of cyclase activity	2386	147	2151	4545	9229
tissue migration	3780	530	1426	3493	9229
cardiac conduction	5803	1655	163	1629	9250
potassium ion import across plasma membrane	1028	6255	743	1225	9251
branching involved in ureteric bud morphogenesis	5573	684	2266	742	9265
regulation of cation transmembrane transport	1318	52	3394	4520	9284
adult locomotory behavior	723	2952	4069	1551	9295
sequestering of calcium ion	1070	1844	6239	146	9299
epithelial cell proliferation involved in renal tubule morphogenesis	1810	1333	1569	4590	9302
regulation of sequestering of calcium ion	1939	1447	5806	115	9307
cellular response to ether	1660	1099	6349	217	9325
cellular response to dopamine	55	4415	3983	898	9351
regulation of ryanodine-sensitive calcium-release channel activity	3135	2018	3586	615	9354
regulation of membrane tubulation	981	2489	3562	2326	9358
maintenance of postsynaptic specialization structure	1932	139	6099	1193	9363
regulation of anatomical structure morphogenesis	1957	4490	827	2095	9369
receptor internalization	2118	222	2489	4553	9382
anatomical structure formation involved in morphogenesis	2492	5623	20	1250	9385
plasma membrane organization	4689	181	1277	3239	9386
optic nerve development	1429	141	2208	5610	9388
taxis	6185	403	2483	319	9390
genitalia development	6795	1777	51	773	9396
axon extension	1796	656	2994	3951	9397
ventral spinal cord interneuron fate commitment	2242	772	1454	4932	9400
cell fate commitment involved in pattern specification	2243	773	1455	4933	9404
excitatory postsynaptic potential	3669	1034	1049	3691	9443
regulation of behavior	275	6884	56	2230	9445
regulation of development, heterochronic	1171	6780	492	1002	9445
chemotaxis	6052	378	2733	292	9455
axonal fasciculation	50	626	1091	7705	9472
neuron projection fasciculation	51	627	1092	7706	9476
tissue morphogenesis	2572	1782	1440	3688	9482
nephric duct development	1722	4977	71	2725	9495
homophilic cell adhesion via plasma membrane adhesion molecules	3211	5650	304	357	9522
striated muscle contraction	3537	2124	2911	958	9530
establishment of planar polarity	691	7317	1291	248	9547
establishment of tissue polarity	692	7318	1292	249	9551
negative regulation of neurotransmitter uptake	4677	157	4365	384	9583
positive regulation of G2/M transition of mitotic cell cycle	96	3891	3171	2440	9598
regulation of short-term neuronal synaptic plasticity	3116	1035	502	4966	9619
regulation of locomotion	1835	237	262	7292	9626
regulation of ion transmembrane transport	2469	44	5185	1946	9644
positive regulation of myoblast fusion	4476	3234	834	1102	9646
regulation of axonogenesis	281	1605	4119	3663	9668
plasma membrane bounded cell projection organization	4833	45	4500	314	9692
epithelium migration	4004	479	1462	3760	9705
regulation of B cell proliferation	1018	196	5096	3409	9719
regulation of cell development	829	178	3936	4782	9725
histone demethylation	1260	3012	1332	4126	9730
anterior/posterior pattern specification	3674	5348	129	582	9733
visual learning	226	1358	6329	1823	9736
detection of abiotic stimulus	4065	26	3317	2329	9737
circadian sleep/wake cycle, sleep	2301	3999	393	3045	9738
carbohydrate transmembrane transport	6977	317	1198	1253	9745
regeneration	5518	306	483	3439	9746
embryo development	100	2684	374	6607	9765
myotube differentiation involved in skeletal muscle regeneration	2948	195	844	5786	9773
positive regulation of multicellular organism growth	345	1973	6523	938	9779
regulation of postsynaptic membrane potential	5906	892	1053	1939	9790
cellular calcium ion homeostasis	5207	144	4038	403	9792
gamma-aminobutyric acid signaling pathway	3597	1095	1836	3282	9810
adenylate cyclase-activating G protein-coupled receptor signaling pathway	5927	1397	463	2026	9813
cellular biogenic amine biosynthetic process	3237	2052	2754	1779	9822
cranial nerve development	1327	322	1894	6286	9829
L-arginine import across plasma membrane	208	6341	2129	1155	9833
protein localization to postsynaptic membrane	4455	4487	164	743	9849
regulation of cell-cell adhesion	1191	1336	4254	3074	9855
synapse maturation	605	5257	487	3514	9863
regulation of neuron apoptotic process	1401	1924	5363	1194	9882
regulation of metal ion transport	4204	97	1551	4030	9882
cell-cell adhesion via plasma-membrane adhesion molecules	6883	2025	231	745	9884
negative regulation of ossification	696	2487	5894	813	9890
regulation of inositol phosphate biosynthetic process	3809	1306	4062	758	9935
monosaccharide transmembrane transport	6757	267	1047	1879	9950
regulation of homotypic cell-cell adhesion	238	77	5262	4374	9951
serotonin transport	2645	3894	3063	349	9951
protein localization to cell periphery	1328	6428	1415	812	9983
postsynapse organization	2549	105	3096	4243	9993
positive regulation of neutrophil migration	3613	806	1552	4056	10027
autonomic nervous system development	459	1214	1746	6609	10028
complement activation, alternative pathway	95	6847	1837	1259	10038
kidney morphogenesis	3107	748	4312	1884	10051
ion transport	5027	114	4711	225	10077
multicellular organismal process	8554	1399	121	3	10077
regulation of gastrulation	881	8036	559	604	10080
mesodermal cell fate commitment	7503	1808	203	581	10095
positive regulation of synaptic transmission, glutamatergic	9253	22	176	651	10102
regulation of cell motility	1868	508	332	7402	10110
epithelial cell migration	4357	517	1697	3544	10115
polyamine biosynthetic process	2376	609	5851	1282	10118
regulation of synaptic vesicle cycle	8048	466	538	1068	10120
regulation of receptor internalization	2682	537	4543	2372	10134
activation of membrane attack complex	308	6315	521	3009	10153
mesonephric tubule morphogenesis	4654	1583	2089	1827	10153
regulation of activation of membrane attack complex	309	6316	522	3010	10157
regulation of synaptic transmission, glutamatergic	8337	17	757	1058	10169
synaptic transmission, dopaminergic	3282	3485	1259	2146	10172
regulation of dopamine receptor signaling pathway	432	931	7816	1000	10179
cell motility	3969	188	616	5412	10185
regulation of mesodermal cell fate specification	5733	2695	428	1329	10185
phospholipase C-activating G protein-coupled receptor signaling pathway	2589	1074	6272	252	10187
cellular response to estrogen stimulus	4691	1114	1162	3220	10187
localization of cell	3970	189	617	5413	10189
hormone-mediated signaling pathway	2541	3549	3074	1038	10202
regulation of neuron projection development	5426	36	3705	1044	10211
cellular response to magnesium ion	603	6813	782	2017	10215
regulation of cellular component movement	1750	675	281	7511	10217
appendage development	40	4075	142	5981	10238
limb development	41	4076	143	5982	10242
positive regulation of natural killer cell cytokine production	2857	538	6806	64	10265
potassium ion transport	3495	552	5880	338	10265
glucose transmembrane transport	6874	202	1035	2155	10266
regulation of tissue remodeling	1771	3540	4951	6	10268
response to dopamine	29	5091	4182	967	10269
neurotransmitter reuptake	3726	5000	1420	127	10273
release of sequestered calcium ion into cytosol by sarcoplasmic reticulum	1511	2034	3531	3216	10292
regulation of neuron death	3043	1865	4546	848	10302
amine metabolic process	339	2920	5176	1870	10305
amine biosynthetic process	3353	2267	2832	1867	10319
response to isoquinoline alkaloid	2189	1613	4608	1916	10326
response to morphine	2190	1614	4609	1917	10330
regulation of heart contraction	4100	4588	618	1037	10343
anatomical structure regression	2389	1348	472	6137	10346
brain renin-angiotensin system	3372	899	3324	2752	10347
myotube differentiation	1573	116	7021	1642	10352
response to magnesium ion	3436	959	4014	1944	10353
negative regulation of potassium ion transport	2159	2589	4499	1107	10354
roof of mouth development	382	4418	207	5353	10360
regulation of epidermis development	39	7454	219	2659	10371
ureteric bud morphogenesis	4448	1400	2880	1646	10374
myelination	1019	1444	7796	131	10390
negative regulation of serotonin uptake	4678	963	4366	385	10392
regulation of sodium ion transmembrane transport	1469	1425	672	6840	10406
negative regulation of locomotion	161	2227	701	7325	10414
regulation of cellular component size	840	1866	4524	3186	10416
cellular response to high light intensity	600	3729	3432	2661	10422
negative regulation of antigen processing and presentation of peptide antigen	3920	1679	1019	3815	10433
atrial cardiac muscle cell action potential	3524	6466	131	327	10448
atrial cardiac muscle cell to AV node cell signaling	3525	6467	132	328	10452
histone lysine demethylation	1816	2732	644	5264	10456
atrial cardiac muscle cell to AV node cell communication	3526	6468	133	329	10456
positive regulation of collateral sprouting	2194	4747	2384	1140	10465
regulation of plasma membrane bounded cell projection organization	1601	119	7046	1702	10468
floor plate development	601	1963	7340	570	10474
cell surface receptor signaling pathway involved in cell-cell signaling	2090	3703	2487	2209	10489
dopamine receptor signaling pathway	635	1078	6539	2241	10493
detection of external stimulus	4618	32	3822	2033	10505
regulation of timing of cell differentiation	864	6086	382	3191	10523
striated muscle cell differentiation	3343	11	5029	2141	10524
astrocyte differentiation	1968	362	6978	1231	10539
skeletal system development	895	3898	990	4759	10542
plasma membrane tubulation	4294	524	1751	3976	10545
positive regulation of striated muscle cell apoptotic process	3796	1739	2162	2850	10547
positive regulation of cardiac muscle cell apoptotic process	3797	1740	2163	2851	10551
axon target recognition	2757	4781	2856	158	10552
response to high light intensity	1052	5389	778	3336	10555
male genitalia development	8592	494	249	1260	10595
dendrite development	5034	6	3188	2370	10598
acute inflammatory response to antigenic stimulus	513	928	2337	6821	10599
ensheathment of neurons	1173	1280	7986	161	10600
regulation of synapse assembly	9258	324	729	289	10600
axon ensheathment	1174	1281	7987	162	10604
potassium ion export across plasma membrane	2293	1932	5145	1251	10621
regulation of interleukin-4 production	481	2150	3138	4860	10629
positive regulation of inositol phosphate biosynthetic process	2634	1697	5891	407	10629
interleukin-4 production	480	2154	3137	4859	10630
positive regulation of vascular endothelial growth factor production	659	5902	3853	269	10683
monovalent inorganic cation homeostasis	326	5342	3682	1336	10686
regulation of receptor localization to synapse	3161	3628	3440	462	10691
semaphorin-plexin signaling pathway	910	1602	2634	5549	10695
positive regulation of cell cycle G2/M phase transition	167	5044	4037	1453	10701
regulation of hippo signaling	774	2119	3998	3825	10716
adenylate cyclase-activating dopamine receptor signaling pathway	1686	782	4908	3350	10726
negative regulation of response to external stimulus	3993	3169	2661	921	10744
regulation of biomineral tissue development	1602	5097	1621	2457	10777
embryonic hindlimb morphogenesis	595	2380	342	7470	10787
inositol phosphate metabolic process	5135	915	4058	687	10795
dendritic spine development	1155	101	5064	4476	10796
embryonic organ morphogenesis	1365	2951	48	6436	10800
release of sequestered calcium ion into cytosol by endoplasmic reticulum	1627	2201	3643	3330	10801
gliogenesis	5014	1840	1201	2746	10801
positive regulation of guanylate cyclase activity	2545	1029	6837	393	10804
cardiac muscle tissue development	2305	329	3278	4894	10806
positive regulation of transmembrane transport	4143	869	5498	311	10821
adhesion of symbiont to host	2281	355	1023	7170	10829
syncytium formation	2049	880	4176	3726	10831
cranial nerve structural organization	2978	1473	1438	4946	10835
membrane depolarization during SA node cell action potential	2915	2746	3131	2089	10881
positive regulation of transcription of Notch receptor target	190	5578	1773	3342	10883
telencephalon development	5732	3355	160	1640	10887
positive regulation of glucose import	3730	283	2403	4477	10893
regulation of urine volume	1535	3955	493	4929	10912
developmental growth	49	314	4102	6454	10919
positive regulation of inositol trisphosphate biosynthetic process	1179	4008	5622	125	10934
regulation of calcium ion transmembrane transport via high voltage-gated calcium channel	405	1081	6817	2635	10938
prostate gland development	2503	2386	2401	3650	10940
protein nitrosylation	4256	2362	4110	219	10947
positive regulation of neural precursor cell proliferation	1244	9172	66	467	10949
peptidyl-cysteine S-nitrosylation	4257	2363	4111	220	10951
positive regulation of bone resorption	956	4951	5054	15	10976
sympathetic nervous system development	346	4392	375	5883	10996
bone resorption	476	2032	8417	71	10996
regulation of anatomical structure size	361	3521	5356	1761	10999
negative regulation of tissue remodeling	990	183	9219	610	11002
T cell antigen processing and presentation	4484	1701	1073	3754	11012
membrane repolarization during cardiac muscle cell action potential	6821	2190	1490	529	11030
negative regulation of cell migration	422	1803	1373	7443	11041
endothelial cell development	554	7962	239	2320	11075
response to bacterial lipoprotein	2084	867	6390	1734	11075
regulation of SMAD protein complex assembly	2916	2966	3215	1988	11085
regulation of cell projection organization	2495	122	6496	1974	11087
muscle system process	4897	475	5455	263	11090
detection of mechanical stimulus	3876	1203	5077	936	11092
ventral spinal cord interneuron differentiation	3363	1526	320	5893	11102
actomyosin structure organization	1380	220	2517	7002	11119
membrane depolarization during atrial cardiac muscle cell action potential	1020	472	5288	4345	11125
hindlimb morphogenesis	394	1903	630	8202	11129
muscle cell differentiation	2875	72	5097	3101	11145
positive regulation of peptide hormone secretion	5706	2196	3061	191	11154
actin filament-based process	1048	167	2079	7865	11159
prostate gland epithelium morphogenesis	1992	1171	3252	4751	11166
regulation of mesodermal cell differentiation	6409	3407	896	454	11166
innervation	3533	2578	4214	854	11179
regulation of platelet aggregation	2320	113	4532	4226	11191
negative regulation of antigen receptor-mediated signaling pathway	294	1328	8472	1101	11195
positive regulation of biomineral tissue development	1699	2108	478	6914	11199
positive regulation of nervous system development	4536	387	3344	2936	11203
negative regulation of dendritic spine development	1790	1253	7180	984	11207
cellular divalent inorganic cation homeostasis	4810	254	5402	755	11221
prostate gland morphogenesis	2397	1562	2132	5134	11225
regulation of neurotransmitter receptor activity	1157	1312	1098	7660	11227
regulation of BMP signaling pathway	831	7485	1263	1649	11228
odontogenesis of dentin-containing tooth	4309	2182	1112	3638	11241
regulation of cell differentiation	1683	1571	6536	1456	11246
syncytium formation by plasma membrane fusion	3104	722	3916	3509	11251
regulation of platelet activation	2735	56	6321	2142	11254
cellular ion homeostasis	3320	299	7098	537	11254
cell-cell fusion	3105	723	3917	3510	11255
regulation of bone resorption	716	2631	7885	28	11260
positive regulation of dermatome development	4034	1772	4858	597	11261
response to alkaloid	1374	4249	4205	1455	11283
neurotransmitter transport	8070	295	2096	828	11289
cerebral cortex GABAergic interneuron differentiation	415	1854	8524	499	11292
lamellipodium assembly	1093	500	8507	1200	11300
regulation of multicellular organism growth	1323	804	6968	2216	11311
regulation of neural precursor cell proliferation	1291	9195	193	653	11332
nephron tubule epithelial cell differentiation	2100	5353	2693	1186	11332
early endosome to recycling endosome transport	1161	699	5324	4153	11337
inorganic cation import across plasma membrane	1006	4402	651	5296	11355
regulation of synapse structure or activity	6871	207	4149	129	11356
inorganic ion import across plasma membrane	1007	4403	652	5297	11359
resolution of recombination intermediates	2424	4504	2541	1895	11364
resolution of mitotic recombination intermediates	2425	4505	2542	1896	11368
regulation of retina development in camera-type eye	2072	5212	2317	1769	11370
detection of temperature stimulus	1479	4561	3655	1676	11371
rhythmic behavior	1359	4883	1411	3740	11393
cranial nerve morphogenesis	2098	711	957	7627	11393
response to amphetamine	504	2576	424	7896	11400
animal organ formation	4502	5182	6	1717	11407
regulation of cation channel activity	3083	133	1914	6282	11412
cardiac myofibril assembly	7826	318	124	3155	11423
response to fluoride	6042	1396	2535	1452	11425
ameboidal-type cell migration	2101	2085	1904	5336	11426
subpallium development	1207	1113	3556	5571	11447
protein demethylation	1605	3796	1597	4451	11449
positive regulation of natural killer cell mediated immunity	2695	1824	6577	353	11449
protein dealkylation	1606	3797	1598	4452	11453
interleukin-2 production	1223	3360	4885	1992	11460
negative regulation of female receptivity	4300	1988	4696	491	11475
neuron maturation	69	805	6816	3788	11478
positive regulation of circadian sleep/wake cycle, sleep	4293	1871	4722	605	11491
positive regulation of Fc receptor mediated stimulatory signaling pathway	2991	1639	2110	4767	11507
cytosolic calcium ion transport	4187	3415	3656	250	11508
regulation of interleukin-2 production	1224	3412	4886	1993	11515
response to nicotine	2947	797	1759	6032	11535
positive regulation of phospholipid metabolic process	2644	1570	3049	4279	11542
regulation of calcium ion transmembrane transport	2561	598	7096	1295	11550
sclerotome development	3986	3064	829	3676	11555
response to water	2504	2040	1164	5850	11558
monoamine transport	5115	406	5621	438	11580
forebrain regionalization	2607	4479	211	4286	11583
regulation of lyase activity	2580	279	3600	5128	11587
regulation of glucose import	4883	260	1528	4922	11593
gephyrin clustering involved in postsynaptic density assembly	5206	316	1493	4579	11594
peptidyl-glutamic acid modification	3823	5241	917	1618	11599
regulation of neurotransmitter levels	7323	1990	1368	928	11609
mature B cell differentiation	4636	3181	1351	2453	11621
cell projection organization	5851	34	5399	348	11632
polyamine metabolic process	3663	427	6841	703	11634
embryonic forelimb morphogenesis	1040	8346	595	1663	11644
negative regulation of bone remodeling	761	1308	9141	439	11649
negative regulation of amino acid transport	2784	3318	1227	4321	11650
negative regulation of cholesterol biosynthetic process	1210	4150	1795	4507	11662
negative regulation of cholesterol metabolic process	1211	4151	1796	4508	11666
monovalent inorganic anion homeostasis	342	1641	3399	6299	11681
inositol phosphate biosynthetic process	5572	929	3551	1634	11686
vesicle-mediated transport in synapse	5412	694	2921	2670	11697
cellular metal ion homeostasis	4707	261	5993	739	11700
regulation of multicellular organismal development	1208	5176	4030	1301	11715
smooth muscle contraction	1991	1446	6439	1842	11718
protein citrullination	1060	3039	4490	3133	11722
histone citrullination	1061	3040	4491	3134	11726
positive regulation of peptide secretion	6111	2896	2591	143	11741
regulation of locomotion involved in locomotory behavior	457	7151	831	3307	11746
positive regulation of epidermis development	2267	5161	3169	1153	11750
receptor localization to synapse	8089	2612	40	1009	11750
ectoderm formation	3114	2022	3876	2768	11780
calcium ion import across plasma membrane	643	3063	398	7696	11800
positive regulation of nucleotide metabolic process	1325	2157	4597	3723	11802
positive regulation of purine nucleotide metabolic process	1326	2158	4598	3724	11806
striated muscle cell apoptotic process	2298	3642	1548	4319	11807
retina morphogenesis in camera-type eye	389	2946	3835	4640	11810
ribonucleotide catabolic process	1286	304	2861	7366	11817
epithelium development	1043	9177	412	1187	11819
energy coupled proton transport, down electrochemical gradient	3799	365	2302	5361	11827
ATP synthesis coupled proton transport	3800	366	2303	5362	11831
endothelial cell migration	5969	3476	722	1668	11835
regulation of voltage-gated sodium channel activity	1799	2880	198	6969	11846
positive regulation of multicellular organismal process	3997	1413	5574	867	11851
regulation of sodium ion transport	937	3864	390	6666	11857
regulation of membrane lipid distribution	209	788	5626	5243	11866
regulation of adenylate cyclase activity	2125	939	1519	7285	11868
base conversion or substitution editing	3623	1632	1459	5155	11869
protein localization to M-band	4054	7020	482	325	11881
negative regulation of T cell receptor signaling pathway	943	2141	7537	1263	11884
thyroid hormone metabolic process	2442	1483	5086	2874	11885
long-chain fatty-acyl-CoA metabolic process	3723	747	270	7147	11887
activation of transmembrane receptor protein tyrosine kinase activity	4763	3767	703	2665	11898
postsynaptic density organization	7912	27	1581	2384	11904
complement-dependent cytotoxicity	781	1272	3774	6078	11905
G protein-coupled glutamate receptor signaling pathway	1285	6899	1780	1963	11927
specification of animal organ identity	4632	5347	49	1907	11935
negative regulation of hippo signaling	2715	1663	1254	6310	11942
positive regulation of cold-induced thermogenesis	2621	1262	1284	6778	11945
ammonium ion metabolic process	408	2622	5450	3491	11971
planar cell polarity pathway involved in axis elongation	2348	6859	666	2098	11971
protein localization to synapse	4955	5192	63	1773	11983
sarcoplasmic reticulum calcium ion transport	2902	1491	5042	2576	12011
regulation of purine nucleotide metabolic process	1775	3266	4748	2223	12012
adenylate cyclase-inhibiting G protein-coupled glutamate receptor signaling pathway	5672	1846	2912	1584	12014
receptor-mediated endocytosis	3088	709	2990	5231	12018
neural tube patterning	955	7440	99	3548	12042
lateral sprouting from an epithelium	4125	1327	771	5821	12044
hindbrain morphogenesis	2201	1591	3287	4978	12057
export across plasma membrane	3754	3981	2670	1655	12060
protein localization to extracellular region	6319	229	3230	2284	12062
retina layer formation	132	9133	112	2703	12080
synaptic transmission, glutamatergic	8121	57	475	3427	12080
embryonic digit morphogenesis	43	8788	318	2942	12091
negative regulation of SMAD protein complex assembly	2134	1843	2687	5432	12096
amine transport	7228	73	3509	1303	12113
insulin-like growth factor receptor signaling pathway	5105	4254	1223	1533	12115
cellular response to anisomycin	9760	1509	432	420	12121
epithelial cell morphogenesis	810	5746	2492	3096	12144
mammary gland alveolus development	1438	5592	4273	845	12148
mammary gland lobule development	1439	5593	4274	846	12152
paraxial mesoderm development	2670	6427	1499	1560	12156
response to ether	822	3409	6255	1681	12167
negative regulation of cAMP-dependent protein kinase activity	2514	2311	631	6725	12181
negative regulation of myotube differentiation	964	3646	6759	824	12193
calcium ion import	1074	1449	3488	6187	12198
ventricular system development	1352	6186	1057	3614	12209
ureteric bud development	3357	2795	3738	2334	12224
hippo signaling	3316	5853	2134	924	12227
postsynaptic specialization organization	8359	65	2319	1491	12234
cellular response to endogenous stimulus	420	5740	3284	2795	12239
regulation of endothelial tube morphogenesis	2827	6351	819	2242	12239
regulation of synapse organization	7364	108	4595	180	12247
glomerular visceral epithelial cell migration	2240	128	5596	4285	12249
neuroligin clustering involved in postsynaptic membrane assembly	5384	1560	1099	4206	12249
positive regulation of growth	1091	2636	3087	5439	12253
regulation of Wnt signaling pathway, planar cell polarity pathway	5159	1648	5107	339	12253
homeostatic process	3045	585	6161	2467	12258
synaptic vesicle cycle	5231	678	4026	2325	12260
transmission of nerve impulse	4335	325	7388	224	12272
natural killer cell mediated cytotoxicity	4802	2249	5161	60	12272
regulation of receptor clustering	2528	1672	1027	7055	12282
calcium ion import into cytosol	732	3406	419	7734	12291
morphogenesis of an endothelium	505	10168	469	1161	12303
adult walking behavior	2213	1012	8151	929	12305
endothelial tube morphogenesis	506	10169	470	1162	12307
negative regulation of neurotransmitter transport	3382	3777	3341	1808	12308
pronephros development	1190	8146	12	2962	12310
regulation of water loss via skin	7140	3434	52	1684	12310
cellular response to light intensity	2567	4924	60	4770	12321
long-term synaptic depression	4138	4180	123	3884	12325
phospholipid translocation	243	1009	7662	3413	12327
negative regulation of BMP signaling pathway	4176	564	2572	5020	12332
cellular cation homeostasis	4478	336	6848	672	12334
renal system development	4927	2031	2394	2988	12340
regulation of calcium ion transport	3067	211	6209	2857	12344
regulation of hydrogen peroxide catabolic process	3629	1581	4042	3098	12350
cell-cell adhesion mediated by cadherin	767	3950	2378	5260	12355
negative regulation of potassium ion export across plasma membrane	3238	5210	3632	280	12360
hindgut morphogenesis	2694	3704	3595	2391	12384
chemical synaptic transmission, postsynaptic	4622	1764	1580	4420	12386
astrocyte development	1172	960	7851	2412	12395
negative regulation of cell activation	1841	2701	4604	3250	12396
regulation of calcium ion transport into cytosol	2788	3068	6145	395	12396
phenol-containing compound metabolic process	4144	379	4539	3337	12399
negative regulation of alpha-beta T cell activation	1033	973	6268	4129	12403
receptor metabolic process	5337	111	1264	5698	12410
postganglionic parasympathetic fiber development	3811	1246	4098	3263	12418
positive regulation of nucleotide biosynthetic process	801	1375	7300	2963	12439
positive regulation of purine nucleotide biosynthetic process	802	1376	7301	2964	12443
locomotion involved in locomotory behavior	3270	2110	1238	5825	12443
establishment of skin barrier	6720	4396	85	1248	12449
cardiac muscle cell apoptotic process	1721	5696	1193	3841	12451
ear morphogenesis	3952	2976	32	5491	12451
proximal/distal pattern formation involved in nephron development	4183	1818	5590	862	12453
regulation of cell morphogenesis involved in differentiation	839	402	5682	5532	12455
negative regulation of cellular component movement	212	3284	1688	7273	12457
specification of nephron tubule identity	4184	1819	5591	863	12457
purine ribonucleotide catabolic process	1217	483	2913	7856	12469
negative regulation of bone resorption	371	570	8881	2662	12484
positive regulation of syncytium formation by plasma membrane fusion	6613	2314	1020	2537	12484
potassium ion transmembrane transport	3396	1073	6933	1084	12486
lipid translocation	285	1229	6295	4683	12492
amyloid-beta clearance	1387	3991	2441	4691	12510
regulation of synapse maturation	5091	2875	1129	3422	12517
negative regulation of striated muscle cell differentiation	967	3938	6595	1031	12531
developmental growth involved in morphogenesis	1701	849	5576	4407	12533
membrane repolarization	9145	1981	337	1078	12541
Wnt signaling pathway, planar cell polarity pathway	2587	8437	1407	111	12542
hindbrain radial glia guided cell migration	5778	669	6003	105	12555
RNA interference	891	6762	3185	1720	12558
regulation of epithelial cell differentiation	542	9876	183	1968	12569
negative regulation of cell motility	325	2843	1827	7577	12572
regulation of G protein-coupled receptor signaling pathway	4611	407	1613	5941	12572
gamma-aminobutyric acid transport	1706	1441	4320	5109	12576
Notch signaling pathway	435	4685	3396	4084	12600
cardiac muscle cell action potential involved in contraction	6573	5063	159	807	12602
regulation of vascular permeability	3236	923	139	8307	12605
histone arginine methylation	1448	3313	4816	3039	12616
positive regulation of phospholipase activity	3691	42	6686	2202	12621
post-translational protein modification	2031	824	1147	8622	12624
mammary gland development	5371	1887	65	5306	12629
walking behavior	2507	815	8274	1034	12630
dendrite self-avoidance	3635	3595	3601	1800	12631
positive regulation of insulin-like growth factor receptor signaling pathway	4656	2436	5270	278	12640
negative regulation of epithelial cell migration	2430	1368	2757	6090	12645
positive regulation of dopamine receptor signaling pathway	4078	1741	3877	2959	12655
cardiac muscle cell membrane repolarization	9061	1423	601	1583	12668
SA node cell to atrial cardiac muscle cell communication	2740	6830	1246	1855	12671
histone H3-K27 trimethylation	5868	1510	431	4863	12672
negative regulation of action potential	1747	3706	2274	4947	12674
positive regulation of renal sodium excretion	2121	5679	949	3937	12686
tissue homeostasis	344	3757	8471	134	12706
negative regulation of smooth muscle contraction	403	3249	6658	2402	12712
negative regulation of cell-cell adhesion	1713	1212	1901	7887	12713
ribonucleoside diphosphate metabolic process	351	7877	406	4082	12716
adherens junction assembly	3188	434	1550	7551	12723
olfactory nerve development	2764	2958	6715	291	12728
cell fate commitment involved in formation of primary germ layer	9058	1335	1032	1315	12740
inclusion body assembly	7041	3297	801	1603	12742
prostate glandular acinus development	2144	651	5794	4154	12743
positive regulation of synapse assembly	8699	125	2375	1570	12769
regulation of branching involved in ureteric bud morphogenesis	5934	4048	1485	1304	12771
regulation of acute inflammatory response to antigenic stimulus	1733	1944	5231	3864	12772
negative regulation of glycolytic process	1202	6611	3274	1697	12784
regulation of protein localization to membrane	246	2317	6892	3335	12790
negative regulation of axon extension	3215	2771	2808	4000	12794
ventricular cardiac muscle cell membrane repolarization	9020	1702	1183	890	12795
inhibition of cysteine-type endopeptidase activity	5876	714	1607	4601	12798
pattern specification involved in kidney development	7098	3058	1777	868	12801
zymogen inhibition	5877	715	1608	4602	12802
renal system pattern specification	7099	3059	1778	869	12805
regulation of appetite	5382	423	3513	3490	12808
catecholamine transport	5584	348	6174	719	12825
negative regulation of peptidyl-cysteine S-nitrosylation	2997	1623	2749	5457	12826
positive regulation of metaphase/anaphase transition of cell cycle	3825	5050	1776	2183	12834
marginal zone B cell differentiation	299	1721	4371	6444	12835
retrograde axonal protein transport	2718	4994	2848	2276	12836
nucleoside diphosphate metabolic process	926	5619	533	5763	12841
regulation of retrograde transport, endosome to Golgi	114	3417	7047	2265	12843
keratinocyte apoptotic process	5341	895	5669	944	12849
cardiac conduction system development	8222	3605	510	512	12849
regulation of keratinocyte differentiation	247	7526	168	4911	12852
vascular process in circulatory system	1781	5496	5110	466	12853
regulation of keratinocyte apoptotic process	5342	896	5670	945	12853
eyelid development in camera-type eye	2399	5751	102	4604	12856
embryonic organ development	2422	2601	150	7684	12857
regulation of embryonic development	1159	5309	2069	4327	12864
GABAergic neuron differentiation	875	4028	7065	907	12875
cGMP metabolic process	4813	779	1219	6074	12885
negative regulation of mRNA processing	3240	1853	4193	3612	12898
serotonin receptor signaling pathway	406	7862	3797	843	12908
negative regulation of dopamine secretion	1017	2251	5404	4240	12912
micturition	2741	1263	3201	5707	12912
negative regulation of transcription by RNA polymerase I	2104	2262	3037	5516	12919
tooth mineralization	6837	2577	2971	536	12921
negative regulation of mRNA metabolic process	1351	4314	3541	3716	12922
regulation of guanylate cyclase activity	3946	481	7658	837	12922
natural killer cell mediated immunity	5561	3047	4237	85	12930
regulation of striated muscle cell differentiation	2363	855	7318	2397	12933
regulation of glucose transmembrane transport	6523	890	2296	3236	12945
positive regulation of hydrogen peroxide catabolic process	2535	5028	3094	2290	12947
apical protein localization	194	6385	2988	3385	12952
regulation of blood vessel remodeling	5515	1707	421	5316	12959
metanephros development	6361	1925	1596	3103	12985
sodium ion homeostasis	2211	5178	1641	3959	12989
multi-organism cellular process	6497	1269	3417	1817	13000
regulation of myoblast fusion	5894	4486	643	1983	13006
negative regulation of adenylate cyclase activity	1275	1249	3872	6612	13008
nephric duct formation	5253	5101	1651	1003	13008
positive regulation of behavior	7264	1362	871	3515	13012
epithelial cell fate commitment	2	4528	264	8228	13022
serotonin metabolic process	1132	1723	4022	6149	13026
mesonephros development	3178	3214	3666	2970	13028
non-canonical Wnt signaling pathway	6766	4560	1610	102	13038
mesonephric duct morphogenesis	3771	6301	461	2509	13042
positive regulation of phospholipase C activity	6946	200	4898	998	13042
histone H3-K27 methylation	245	1393	3338	8068	13044
negative regulation of viral transcription	2830	4097	1349	4774	13050
positive regulation of alcohol biosynthetic process	2805	1497	5456	3298	13056
multicellular organismal water homeostasis	8059	163	542	4300	13064
kidney development	4534	2095	2430	4018	13077
positive regulation of secretion by cell	6887	644	5461	87	13079
positive regulation of mitotic cell cycle phase transition	320	4760	6460	1540	13080
positive regulation of somatic stem cell population maintenance	2828	5253	2927	2073	13081
purine nucleoside diphosphate metabolic process	495	8338	504	3761	13098
purine ribonucleoside diphosphate metabolic process	496	8339	505	3762	13102
cell migration in hindbrain	2730	1645	8092	643	13110
regulation of JUN kinase activity	6734	3882	1132	1365	13113
adipose tissue development	3245	3432	2521	3919	13117
detection of mechanical stimulus involved in sensory perception of sound	6247	2702	2859	1314	13122
response to rapamycin	4453	749	4521	3415	13138
forebrain neuron fate commitment	1408	6885	690	4156	13139
positive regulation of cell-cell adhesion mediated by integrin	1761	4797	1790	4801	13149
cartilage development	5069	5305	668	2109	13151
regulation of Wnt signaling pathway	3407	2888	5516	1341	13152
segment specification	3386	7694	1014	1060	13154
purine nucleotide catabolic process	1724	995	2368	8071	13158
mesoderm formation	8691	602	843	3027	13163
membrane repolarization during ventricular cardiac muscle cell action potential	6607	1998	4311	251	13167
extracellular matrix organization	5708	3694	3618	152	13172
phosphatidylserine acyl-chain remodeling	1266	2272	3640	6009	13187
negative regulation of neuron apoptotic process	4668	1323	6389	808	13188
negative regulation of interleukin-2 production	1108	6469	4586	1036	13199
optic nerve structural organization	2794	5183	2963	2261	13201
response to amine	490	3558	660	8511	13219
regulation of intracellular estrogen receptor signaling pathway	1016	7278	1522	3403	13219
lymphangiogenesis	2487	4256	496	5986	13225
cell communication involved in cardiac conduction	2964	6716	161	3387	13228
regulation of deadenylation-independent decapping of nuclear-transcribed mRNA	374	11685	673	504	13236
positive regulation of deadenylation-independent decapping of nuclear-transcribed mRNA	375	11686	674	505	13240
negative regulation of polynucleotide adenylyltransferase activity	376	11687	675	506	13244
protein palmitoylation	3594	5073	4340	241	13248
mesonephric epithelium development	3627	3209	3971	2444	13251
mesonephric tubule development	3628	3210	3972	2445	13255
regulation of nucleotide metabolic process	1988	3962	4925	2386	13261
excitatory synapse assembly	9482	92	752	2943	13269
cell-substrate adhesion	4807	321	3667	4489	13284
positive regulation of cation transmembrane transport	6554	1317	5127	287	13285
metanephric renal vesicle morphogenesis	5175	4096	3952	69	13292
mesonephric duct development	3455	7508	237	2101	13301
cellular response to granulocyte macrophage colony-stimulating factor stimulus	754	6819	3525	2220	13318
positive regulation of sodium ion transmembrane transport	901	2902	6916	2601	13320
response to granulocyte macrophage colony-stimulating factor	755	6820	3526	2221	13322
mesodermal cell differentiation	9318	761	2067	1183	13329
B cell receptor signaling pathway	3817	1544	3266	4703	13330
cerebellum morphogenesis	2822	2572	3792	4148	13334
axon extension involved in axon guidance	2454	1388	1895	7600	13337
natural killer cell degranulation	2608	2511	2854	5364	13337
cell junction assembly	7941	2488	2291	620	13340
neuron projection extension involved in neuron projection guidance	2455	1389	1896	7601	13341
regulation of natural killer cell mediated immunity	6375	2523	4413	36	13347
negative regulation of organic acid transport	4135	2001	2549	4664	13349
inner ear morphogenesis	5481	1622	241	6008	13352
temperature homeostasis	893	3928	594	7949	13364
positive regulation of mitotic metaphase/anaphase transition	3338	4284	1344	4399	13365
positive regulation of mitotic sister chromatid separation	3339	4285	1345	4400	13369
vacuolar transport	1454	682	4260	6983	13379
gastrulation	7640	1468	1105	3167	13380
regulation of heart rate by hormone	2861	5577	2747	2196	13381
negative regulation of protein catabolic process	1160	251	9056	2916	13383
heterophilic cell-cell adhesion via plasma membrane cell adhesion molecules	2779	593	2701	7335	13408
paramesonephric duct development	5392	3619	189	4221	13421
regulation of protein kinase C signaling	1836	4030	2624	4944	13434
parasympathetic nervous system development	4193	214	1574	7455	13436
vesicle tethering	1423	414	4952	6660	13449
regulation of glutamate secretion	3315	7822	474	1839	13450
positive regulation of amyloid fibril formation	5160	3252	4569	469	13450
negative regulation of glutamate secretion	1156	8105	34	4169	13464
cellular chemical homeostasis	4698	863	7020	886	13467
microglial cell activation	2781	1668	8259	765	13473
retrograde trans-synaptic signaling by soluble gas	2949	5424	2975	2130	13478
response to epidermal growth factor	2647	5810	2734	2289	13480
retrograde trans-synaptic signaling by nitric oxide	2950	5425	2976	2131	13482
positive regulation of epithelial cell migration	5636	1972	2007	3872	13487
regulation of circadian sleep/wake cycle, sleep	3480	7381	535	2092	13488
positive regulation of membrane tubulation	2204	3654	6250	1383	13491
regulation of T cell antigen processing and presentation	10300	954	1256	983	13493
negative regulation of meiotic nuclear division	3298	840	7048	2308	13494
lysosomal transport	3177	180	4043	6106	13506
odontogenesis	4757	4813	694	3256	13520
positive chemotaxis	6169	3575	1115	2663	13522
positive regulation of developmental growth	176	1796	5201	6351	13524
positive regulation of secretion	7249	1188	4924	164	13525
response to selenium ion	402	4376	6779	1970	13527
acetate ester transport	5669	1064	2066	4729	13528
establishment of epithelial cell polarity	4381	2228	4710	2213	13532
spinal cord dorsal/ventral patterning	2537	2293	4255	4453	13538
regulation of establishment of planar polarity	3492	7806	2078	165	13541
protein localization to membrane	1119	8780	3030	617	13546
water homeostasis	8748	234	621	3945	13548
glomerulus morphogenesis	4329	720	1815	6696	13560
rhythmic process	2807	2703	5554	2502	13566
endoplasmic reticulum-Golgi intermediate compartment organization	2344	450	1792	8981	13567
chloride ion homeostasis	341	3533	3398	6298	13570
regulation of growth hormone secretion	1684	3781	7879	230	13574
negative regulation of cell-substrate adhesion	98	1839	9135	2504	13576
G protein-coupled receptor signaling pathway	7780	560	4806	430	13576
striatum development	1122	1436	7612	3414	13584
regulation of serotonin uptake	5638	2274	5034	641	13587
positive regulation of amine transport	6002	505	4999	2083	13589
long-chain fatty-acyl-CoA biosynthetic process	6151	770	547	6125	13593
response to manganese ion	863	369	6956	5407	13595
T cell apoptotic process	5620	1258	5841	876	13595
cyclic nucleotide catabolic process	1287	272	3788	8250	13597
positive regulation of receptor-mediated endocytosis	1562	6990	4334	712	13598
anatomical structure homeostasis	144	4113	9138	206	13601
regulation of bone mineralization	3261	6243	641	3462	13607
RNA destabilization	3746	6338	894	2637	13615
cell redox homeostasis	2350	9657	645	973	13625
negative regulation of toll-like receptor signaling pathway	3383	1809	4559	3883	13634
regulation of exocytosis	4537	2750	5769	594	13650
carbohydrate transport	7031	1215	2714	2692	13652
positive regulation of urine volume	252	5007	709	7686	13654
circadian sleep/wake cycle process	3341	5661	678	3999	13679
regulation of definitive erythrocyte differentiation	4406	2419	3871	2983	13679
cannabinoid signaling pathway	34	3003	4302	6348	13687
positive regulation of Wnt signaling pathway, planar cell polarity pathway	4961	1751	4330	2664	13706
microvillus assembly	2420	992	9076	1224	13712
negative regulation of synaptic transmission	3853	6794	792	2274	13713
positive regulation of cell migration	4392	1307	2305	5709	13713
neurotransmitter secretion	6099	422	5113	2084	13718
interneuron migration	1025	4633	7880	196	13734
activation of protein kinase activity	3140	242	2603	7753	13738
response to alcohol	2563	2439	5417	3323	13742
membrane repolarization during action potential	7769	2367	2653	959	13748
positive regulation of bone mineralization	2975	3211	357	7221	13764
postsynaptic density assembly	9248	58	2128	2331	13765
definitive erythrocyte differentiation	6260	4643	1813	1050	13766
positive regulation of cell adhesion mediated by integrin	2570	2486	2782	5942	13780
regulation of plasma membrane organization	647	1027	6890	5217	13781
signal release from synapse	6100	482	5114	2085	13781
positive regulation of protein secretion	6165	5538	1793	290	13786
striated muscle tissue development	3984	949	3920	4936	13789
cold-induced thermogenesis	1852	3148	633	8159	13792
regulation of cold-induced thermogenesis	1853	3149	634	8160	13796
regulation of CD8-positive, alpha-beta T cell activation	1961	5488	5023	1330	13802
endothelium development	1823	9684	376	1921	13804
muscle organ morphogenesis	6568	259	1374	5614	13815
tangential migration from the subventricular zone to the olfactory bulb	2790	8358	691	1979	13818
T cell mediated immunity	8776	838	3455	749	13818
regulation of neurotransmitter transport	4070	1056	6650	2070	13846
regulation of protein localization to cell periphery	1718	5170	3753	3207	13848
cyclic nucleotide metabolic process	1446	294	3439	8695	13874
myosin filament assembly	4789	787	4704	3596	13876
heart valve formation	1076	7886	4675	255	13892
lymphocyte apoptotic process	5960	1882	5357	697	13896
renal sodium excretion	3431	5739	380	4347	13897
cGMP-mediated signaling	1386	1530	5791	5192	13899
positive regulation of natural killer cell mediated cytotoxicity	3447	2242	7628	583	13900
regulation of renal sodium excretion	2642	7091	585	3586	13904
regulation of growth	883	1875	5160	6014	13932
spinal cord patterning	3171	3273	2631	4858	13933
regulation of potassium ion transmembrane transport	4220	1341	6131	2243	13935
negative regulation of protein kinase activity by regulation of protein phosphorylation	4113	4703	4393	734	13943
T cell mediated cytotoxicity	8783	2970	2068	124	13945
cellular biogenic amine catabolic process	1632	3668	7900	746	13946
regulation of blood circulation	5157	5116	2723	951	13947
negative regulation of mRNA splicing, via spliceosome	5237	3610	1507	3603	13957
phospholipid transport	278	3374	4988	5321	13961
ATP generation from ADP	980	7369	157	5459	13965
negative regulation of intracellular estrogen receptor signaling pathway	6920	2538	2104	2407	13969
regulation of ventricular cardiac muscle cell membrane repolarization	8579	1404	1243	2751	13977
proton transmembrane transport	929	4044	6893	2114	13980
leukocyte mediated cytotoxicity	5694	1790	6223	276	13983
regulation of atrial cardiac muscle cell membrane repolarization	2884	1585	7082	2439	13990
mesoderm morphogenesis	8834	535	1143	3480	13992
gland development	4796	5836	46	3316	13994
circulatory system process	3137	2667	7736	465	14005
regulation of membrane depolarization	3294	2588	2449	5675	14006
smoothened signaling pathway involved in ventral spinal cord interneuron specification	1013	3344	5299	4356	14012
negative regulation of cGMP-mediated signaling	2681	2445	3110	5776	14012
smoothened signaling pathway involved in spinal cord motor neuron cell fate specification	1014	3345	5300	4357	14016
negative regulation of cell-cell adhesion mediated by cadherin	1566	478	5167	6805	14016
negative regulation of growth	2508	1303	3663	6543	14017
negative regulation of receptor binding	5203	1028	794	6994	14019
endothelial tube lumen extension	3054	5629	3067	2291	14041
neuromuscular process controlling balance	5086	193	4513	4254	14046
positive regulation of lamellipodium assembly	136	1472	8142	4299	14049
sinoatrial node development	4664	4680	3059	1647	14050
positive regulation of fatty acid oxidation	1477	3251	4164	5173	14065
phagocytosis, recognition	2003	1082	6257	4727	14069
regulation of long-term neuronal synaptic plasticity	5273	2003	3537	3266	14079
antigen receptor-mediated signaling pathway	6087	2142	5089	768	14086
mammary gland branching involved in pregnancy	7480	4671	1283	655	14089
melanocyte differentiation	273	1615	8018	4190	14096
regulation of interleukin-5 production	130	1395	6998	5579	14102
positive regulation of cell motility	4983	1270	2659	5191	14103
positive regulation of neutrophil chemotaxis	4989	2244	1048	5822	14103
glycolytic process	1530	7109	138	5328	14105
negative regulation of response to extracellular stimulus	3911	123	4167	5908	14109
negative regulation of response to nutrient levels	3912	124	4168	5909	14113
developmental induction	6481	5439	1100	1093	14113
negative regulation of transcription, DNA-templated	764	3994	2797	6569	14124
multicellular organismal movement	5468	549	3534	4577	14128
musculoskeletal movement	5469	550	3535	4578	14132
negative regulation of response to food	3909	160	4165	5906	14140
regulation of mitotic metaphase/anaphase transition	2892	6115	3507	1628	14142
negative regulation of appetite	3910	161	4166	5907	14144
cell communication by electrical coupling	3804	8878	401	1066	14149
excitatory chemical synaptic transmission	5197	5899	2949	106	14151
lens development in camera-type eye	1238	588	3703	8638	14167
growth	838	744	4465	8132	14179
epithelial cell differentiation involved in prostate gland development	5254	1273	740	6921	14188
growth hormone secretion	1158	5677	6645	725	14205
vocal learning	7709	2296	1293	2907	14205
skeletal muscle contraction	3467	416	8562	1762	14207
imitative learning	7710	2297	1294	2908	14209
circadian sleep/wake cycle, non-REM sleep	2825	3340	2805	5251	14221
regulation of antigen processing and presentation of peptide antigen	4868	2798	1863	4696	14225
cell differentiation involved in kidney development	7572	5372	1029	256	14229
autophagy of nucleus	667	898	4912	7759	14236
response to axon injury	8678	2271	1434	1853	14236
germinal center formation	3660	1352	1665	7563	14240
interleukin-5 production	129	1537	6997	5578	14241
peptidyl-threonine dephosphorylation	6492	2876	2382	2507	14257
microspike assembly	5979	1248	1998	5033	14258
negative chemotaxis	6274	1955	2562	3504	14295
prostatic bud formation	5689	2749	1155	4709	14302
negative regulation of Wnt signaling pathway	4377	3197	3262	3479	14315
positive regulation of protein localization to membrane	607	1320	7329	5064	14320
glycine import across plasma membrane	4671	1129	4786	3742	14328
regulation of toll-like receptor signaling pathway	3506	2165	3452	5206	14329
striated muscle cell development	7694	70	1818	4749	14331
indole-containing compound metabolic process	877	3027	4817	5629	14350
positive regulation of p38MAPK cascade	4194	1747	1854	6556	14351
protein deneddylation	70	2218	6803	5261	14352
negative regulation of cyclase activity	1952	679	4725	6996	14352
extracellular structure organization	5188	5294	3761	116	14359
regulation of substrate adhesion-dependent cell spreading	2823	4448	4495	2596	14362
pyrimidine-containing compound catabolic process	6308	2086	4116	1872	14382
DNA modification	446	5004	4697	4236	14383
cellular component assembly involved in morphogenesis	7072	418	1788	5110	14388
radial glia guided migration of Purkinje cell	6559	1621	6180	30	14390
regulation of cAMP-dependent protein kinase activity	475	5268	576	8076	14395
response to light stimulus	3414	601	2472	7908	14395
glucose import	7409	149	1179	5669	14406
modulation of excitatory postsynaptic potential	5360	1120	1963	5967	14410
cerebral cortex GABAergic interneuron development	510	1574	12241	89	14414
calcium-mediated signaling using intracellular calcium source	3403	3593	5805	1613	14414
epithelial cell differentiation involved in mammary gland alveolus development	3842	6470	851	3253	14416
renal vesicle development	6515	4051	3654	208	14428
negative regulation of RNA biosynthetic process	821	4073	2894	6642	14430
negative regulation of axon extension involved in axon guidance	3127	3583	899	6829	14438
cAMP catabolic process	158	179	3194	10930	14461
steroid hormone mediated signaling pathway	5287	4291	3687	1197	14462
cranial nerve formation	3345	3269	1477	6378	14469
MHC protein complex assembly	4264	5047	2578	2586	14475
negative regulation of cellular component organization	3029	2508	7896	1049	14482
establishment or maintenance of transmembrane electrochemical gradient	3761	3314	7003	406	14484
cellular response to epidermal growth factor stimulus	3426	4551	4789	1719	14485
positive regulation of acute inflammatory response to antigenic stimulus	372	5674	6670	1786	14502
positive regulation of inflammatory response to antigenic stimulus	1935	2388	5872	4307	14502
positive regulation of low-density lipoprotein particle receptor catabolic process	3619	3582	4181	3130	14512
peristalsis	4751	3949	5497	331	14528
cell-cell signaling by wnt	2325	5220	4209	2775	14529
post-anal tail morphogenesis	4912	8676	447	495	14530
spermatogenesis, exchange of chromosomal proteins	1919	4974	6183	1459	14535
negative regulation of alpha-beta T cell differentiation	1197	3722	7656	1967	14542
adaptive thermogenesis	2652	2502	1128	8263	14545
embryonic camera-type eye formation	6212	3212	31	5094	14549
neuronal signal transduction	6848	6609	993	99	14549
postsynaptic membrane assembly	5435	1236	796	7087	14554
negative regulation of sodium ion transport	925	224	5012	8403	14564
protein localization to plasma membrane	1255	7712	3802	1796	14565
positive regulation of fatty acid beta-oxidation	1960	623	5119	6865	14567
homotypic cell-cell adhesion	126	1318	5975	7150	14569
immune response-activating cell surface receptor signaling pathway	7190	1232	5452	695	14569
mitochondrial ATP synthesis coupled proton transport	4299	1634	2056	6586	14575
regulation of natural killer cell mediated cytotoxicity	7199	1997	5351	29	14576
negative regulation of canonical Wnt signaling pathway	2516	7854	1502	2720	14592
negative regulation of interleukin-4 production	6364	2537	517	5182	14600
cell killing	4396	1532	8146	535	14609
dopamine transport	7756	210	6456	204	14626
regulation of epithelial cell differentiation involved in kidney development	2736	7981	3713	197	14627
succinate transport	6283	1493	5847	1011	14634
succinate transmembrane transport	6284	1494	5848	1012	14638
regulation of inclusion body assembly	9015	3771	460	1393	14639
negative regulation of locomotion involved in locomotory behavior	1644	2961	212	9823	14640
negative regulation of nucleic acid-templated transcription	795	4372	2852	6624	14643
regulation of system process	3186	3171	6561	1735	14653
Wnt signaling pathway	2154	5415	4472	2624	14665
somatotropin secreting cell differentiation	4060	2788	4368	3450	14666
exosomal secretion	482	1771	4244	8171	14668
tube development	3575	7692	912	2490	14669
positive regulation of cell communication by electrical coupling	4602	5324	4287	456	14669
epithelial cell differentiation	3047	9443	951	1232	14673
reproductive behavior	5286	1775	4138	3496	14695
hematopoietic stem cell homeostasis	6740	783	1988	5185	14696
nucleotide catabolic process	3035	5008	272	6386	14701
response to pain	2713	5939	5815	237	14704
positive regulation of neurogenesis	3233	1390	5543	4539	14705
heart development	3463	3945	2608	4693	14709
visceral motor neuron differentiation	3729	6392	861	3733	14715
response to toxic substance	2287	3080	7278	2072	14717
vestibular reflex	3421	7338	2272	1686	14717
negative regulation of sodium ion transmembrane transport	2220	1893	2684	7923	14720
primitive streak formation	3367	10381	107	875	14730
receptor-mediated virion attachment to host cell	593	6219	4504	3416	14732
heart valve morphogenesis	3192	8840	2342	367	14741
chemical homeostasis within a tissue	1068	3505	5827	4350	14750
dorsal/ventral neural tube patterning	1185	8028	240	5300	14753
regulation of heart rate	1669	10356	2076	652	14753
digestive tract morphogenesis	265	6864	4766	2865	14760
apoptotic cell clearance	1303	1443	7280	4734	14760
cellular response to nerve growth factor stimulus	3591	541	8587	2044	14763
amelogenesis	7532	2852	3050	1331	14765
muscle cell development	6092	239	2622	5813	14766
magnesium ion homeostasis	1124	9243	3756	650	14773
muscle tissue development	4512	1109	3516	5641	14778
amine catabolic process	2245	5001	6517	1019	14782
otolith development	7474	360	1015	5952	14801
L-arginine transport	1256	6124	4507	2917	14804
intestinal absorption	143	6066	7725	877	14811
positive regulation of cellular component biogenesis	1702	2310	4426	6376	14814
positive regulation of cell-cell adhesion mediated by cadherin	2969	6757	378	4710	14814
regulation of cardiac muscle contraction	2256	7314	795	4450	14815
regulation of phospholipase C activity	7565	100	5719	1435	14819
collagen-activated signaling pathway	5776	2877	4983	1185	14821
antigen processing and presentation of peptide antigen via MHC class I	3232	10642	577	378	14829
ADP metabolic process	622	8514	373	5323	14832
Wnt signaling pathway, calcium modulating pathway	10606	1646	705	1875	14832
negative regulation of phosphorylation	2284	629	9594	2333	14840
regulation of skeletal muscle contraction by regulation of release of sequestered calcium ion	4129	3723	3940	3050	14842
regulation of glycolytic process	3011	5653	948	5232	14844
positive regulation of keratinocyte differentiation	2205	8559	956	3132	14852
postsynaptic specialization assembly	9383	240	3552	1680	14855
complement activation	867	7392	5058	1539	14856
microglia development	4610	2479	4511	3260	14860
mesonephric tubule formation	2987	7043	4162	678	14870
neutrophil migration	4509	285	6679	3406	14879
bone morphogenesis	145	4875	4565	5299	14884
SA node cell action potential	1955	6221	5463	1254	14893
lateral motor column neuron migration	5015	8100	1075	704	14894
SA node cell to atrial cardiac muscle cell signaling	1956	6222	5464	1255	14897
regulation of metaphase/anaphase transition of cell cycle	3641	6634	4333	296	14904
regulation of fibroblast migration	2586	1951	3441	6934	14912
embryonic eye morphogenesis	5513	2140	24	7235	14912
negative regulation of RNA metabolic process	610	4801	3225	6287	14923
negative regulation of multicellular organismal process	4308	2005	3088	5530	14931
drinking behavior	3328	5598	3630	2382	14938
regulation of syncytium formation by plasma membrane fusion	7494	3227	750	3476	14947
Golgi vesicle budding	1177	8185	3498	2090	14950
regulation of phospholipase activity	4387	9	8040	2514	14950
postsynapse assembly	9312	244	1449	3948	14953
regulation of mesenchymal to epithelial transition involved in metanephros morphogenesis	7429	2985	4387	154	14955
cardiac muscle thin filament assembly	4370	7293	536	2759	14958
hindgut development	3378	4750	4153	2691	14972
peptidyl-arginine omega-N-methylation	3666	1896	7204	2207	14973
p38MAPK cascade	3371	2549	4628	4427	14975
developmental cell growth	1141	335	8122	5382	14980
positive regulation of locomotion	5566	766	2765	5884	14981
regulation of amine transport	7208	130	6404	1244	14986
positive regulation of ion transport	8437	1154	4756	663	15010
regulation of MAP kinase activity	8219	993	5215	589	15016
vesicle docking	1344	1098	7766	4816	15024
positive regulation of myelination	1293	5594	7952	187	15026
genetic imprinting	4092	1720	4568	4646	15026
regulation of fatty acid oxidation	2034	2147	2710	8141	15032
ceramide biosynthetic process	6329	1918	2537	4251	15035
regulation of neutrophil migration	5397	2441	710	6497	15045
response to iron ion	639	533	7172	6706	15050
mesenchymal cell apoptotic process	6347	2923	543	5247	15060
regulation of protein localization to synapse	3005	5477	3402	3178	15062
amino acid import across plasma membrane	2279	7876	4246	664	15065
tissue remodeling	2566	4307	7797	405	15075
forelimb morphogenesis	1490	9415	941	3235	15081
pointed-end actin filament capping	1579	4553	5036	3914	15082
immune response-activating signal transduction	7191	1742	5453	696	15082
renal vesicle morphogenesis	6202	3370	5349	171	15092
neurofilament cytoskeleton organization	3126	2604	3624	5740	15094
antigen processing and presentation of endogenous antigen	4412	7959	2400	323	15094
B cell proliferation	4443	392	6752	3507	15094
positive regulation of embryonic development	2436	8378	3134	1150	15098
regulation of bone remodeling	1005	6097	7997	1	15100
DNA methylation or demethylation	298	4855	5365	4583	15101
myelin assembly	7209	5120	1520	1276	15125
protein localization to cell cortex	4988	3917	2495	3727	15127
fatty-acyl-CoA metabolic process	4779	1876	317	8158	15130
regulation of catecholamine secretion	5052	349	6584	3147	15132
epithelial tube morphogenesis	2270	5715	1736	5415	15136
positive regulation of cell cycle phase transition	735	6721	6444	1241	15141
cerebellar cortex development	2105	6267	1051	5722	15145
regulation of signaling receptor activity	1050	2694	3385	8017	15146
negative regulation of activation of membrane attack complex	1940	2402	149	10655	15146
fatty-acyl-CoA biosynthetic process	5635	1633	656	7223	15147
vesicle fusion	5650	1062	3878	4558	15148
gastro-intestinal system smooth muscle contraction	1561	5186	1993	6410	15150
negative regulation of leukocyte activation	1725	6426	3348	3652	15151
heart morphogenesis	1115	6823	3978	3240	15156
COPI-coated vesicle budding	5546	1039	4956	3623	15164
minus-end-directed organelle transport along microtubule	2093	5606	6214	1252	15165
Golgi transport vesicle coating	5547	1040	4957	3624	15168
COPI coating of Golgi vesicle	5548	1041	4958	3625	15172
nucleoside phosphate catabolic process	3473	4329	216	7158	15176
antigen processing and presentation of endogenous peptide antigen via MHC class I	4730	9775	609	63	15177
leukocyte aggregation	12551	1100	1094	445	15190
positive regulation of vascular permeability	7775	104	1321	6000	15200
granulocyte differentiation	3923	569	3229	7482	15203
positive regulation of cell junction assembly	8775	1881	1699	2849	15204
regulation of skeletal muscle contraction by calcium ion signaling	4978	1159	5037	4032	15206
regulation of skeletal muscle contraction	8669	2414	3560	568	15211
regulation of striated muscle cell apoptotic process	4342	4110	1769	4991	15212
regulation of synaptic vesicle exocytosis	2799	2569	8360	1486	15214
response to endogenous stimulus	423	7525	3604	3671	15223
regulation of release of sequestered calcium ion into cytosol by sarcoplasmic reticulum	2214	5940	2696	4378	15228
mating behavior	5790	3142	4248	2065	15245
actin filament reorganization	8303	507	5247	1192	15249
negative regulation of sodium ion transmembrane transporter activity	1800	3262	2362	7831	15255
positive regulation of gastrulation	2167	10163	802	2123	15255
negative regulation of cell growth	3865	2284	2548	6559	15256
regulation of cardiac muscle cell contraction	987	9120	127	5023	15257
rostrocaudal neural tube patterning	4295	6692	227	4044	15258
positive regulation of ion transmembrane transport	5938	1958	6911	453	15260
positive regulation of neurotransmitter uptake	1832	5747	6333	1353	15265
circadian sleep/wake cycle	2248	7265	591	5164	15268
Fc receptor mediated stimulatory signaling pathway	8538	1332	3174	2233	15277
regulation of epithelium regeneration	2841	5892	3649	2903	15285
epithelium regeneration	2842	5893	3650	2904	15289
intracellular sterol transport	7946	2238	1123	3982	15289
intracellular cholesterol transport	7947	2239	1124	3983	15293
response to nerve growth factor	2879	970	8867	2585	15301
heart field specification	4133	9383	518	1268	15302
regulation of cGMP-mediated signaling	3287	2482	1886	7658	15313
regulation of potassium ion export across plasma membrane	7053	2726	3318	2222	15319
maintenance of synapse structure	1643	66	6737	6875	15321
response to cobalt ion	4150	4086	4285	2801	15322
lamellipodium organization	2274	501	8811	3738	15324
fatty acid derivative biosynthetic process	2995	8015	882	3436	15328
amyloid-beta clearance by cellular catabolic process	984	1151	7251	5943	15329
embryonic cranial skeleton morphogenesis	3639	8402	936	2352	15329
trigeminal nerve development	2862	3537	1406	7526	15331
negative regulation of response to wounding	8637	834	4700	1166	15337
cerebellar cortex formation	3377	5213	910	5839	15339
Spemann organizer formation	4227	1957	5166	3991	15341
negative regulation of CD4-positive, alpha-beta T cell differentiation	3344	3178	8027	797	15346
L-arginine transmembrane transport	763	8860	3546	2182	15351
establishment of meiotic spindle localization	2219	5790	6069	1278	15356
cellular component maintenance	5062	400	6082	3814	15358
glutamine biosynthetic process	9899	2531	1694	1237	15361
positive regulation of cyclase activity	6074	563	6451	2280	15368
photoreceptor cell development	6824	825	5221	2499	15369
cerebellar Purkinje cell differentiation	564	10266	715	3828	15373
cellular homeostasis	4012	2041	8001	1320	15374
brown fat cell differentiation	3878	1872	4191	5434	15375
neuromuscular synaptic transmission	7851	1314	4323	1887	15375
negative regulation of cellular response to growth factor stimulus	4262	2983	2662	5469	15376
negative regulation of apoptotic process involved in morphogenesis	5818	2117	2356	5088	15379
cardiac pacemaker cell development	12379	1664	445	894	15382
negative regulation of apoptotic process involved in development	5819	2118	2357	5089	15383
negative regulation of neuron death	6113	1456	6829	985	15383
columnar/cuboidal epithelial cell differentiation	5399	1020	791	8175	15385
spinal cord motor neuron migration	5526	8548	273	1040	15387
neuromuscular process controlling posture	1719	3529	9050	1095	15393
positive regulation of granulocyte chemotaxis	5462	2640	1237	6063	15402
linoleic acid metabolic process	4042	7930	2376	1061	15409
tissue regeneration	6944	1650	292	6526	15412
embryonic retina morphogenesis in camera-type eye	6225	1117	2667	5417	15426
response to organic cyclic compound	1412	5815	3680	4530	15437
positive regulation of glycolytic process	5321	1586	2778	5755	15440
protein import into peroxisome membrane	1231	8135	5322	761	15449
observational learning	7711	3535	1295	2909	15450
mechanoreceptor differentiation	2960	5012	2399	5083	15454
mesendoderm development	2768	10324	213	2156	15461
DNA dealkylation	7533	1033	3427	3475	15468
detection of mechanical stimulus involved in sensory perception of pain	3100	4306	6263	1803	15472
dentate gyrus development	9045	2292	446	3708	15491
oligodendrocyte differentiation	3406	9470	2083	542	15501
CD8-positive, alpha-beta T cell activation	4945	4872	5448	246	15511
embryo development ending in birth or egg hatching	549	5469	2133	7363	15514
negative regulation of nuclear division	3334	4428	5500	2257	15519
regulation of cell killing	7491	1492	6430	110	15523
positive regulation of lipase activity	4238	48	7241	3998	15525
epithelial cell differentiation involved in kidney development	6933	5969	2509	117	15528
regulation of T cell receptor signaling pathway	4332	1455	7775	1976	15538
cell proliferation in forebrain	6209	452	2763	6117	15541
BMP signaling pathway	2844	5457	2621	4634	15556
negative regulation of JUN kinase activity	2179	9032	2762	1585	15558
ionotropic glutamate receptor signaling pathway	7329	7650	363	222	15564
cerebellar cortex morphogenesis	2753	4352	2250	6210	15565
response to monosodium glutamate	1476	2656	2432	9004	15568
spontaneous synaptic transmission	4504	3042	4989	3033	15568
cellular response to gonadotropin-releasing hormone	1502	8701	1355	4014	15572
positive regulation of hormone secretion	7708	1601	6000	268	15577
mRNA destabilization	4059	7058	1521	2940	15578
negative regulation of platelet activation	3960	219	8578	2825	15582
purine-containing compound catabolic process	3173	1076	3684	7659	15592
regulation of synapse structural plasticity	1444	3093	7833	3225	15595
trans-synaptic signaling, modulating synaptic transmission	2273	1686	8143	3501	15603
regulation of cell adhesion	2255	1845	6381	5136	15617
regulation of fatty acid beta-oxidation	2024	707	4574	8314	15619
metanephric tubule development	9291	3919	1326	1092	15628
peptidyl-arginine N-methylation	1884	2841	7878	3028	15631
negative regulation of tumor necrosis factor-mediated signaling pathway	5710	2383	5820	1721	15634
positive regulation of mitotic cell cycle	1898	8841	1301	3598	15638
G protein-coupled serotonin receptor signaling pathway	631	8660	4998	1350	15639
mRNA splice site selection	2826	4874	1561	6380	15641
glutamate secretion	3348	8850	1801	1644	15643
peptidyl-arginine modification	328	5957	6954	2406	15645
maternal process involved in female pregnancy	3515	2989	2427	6717	15648
positive regulation of interleukin-5 production	22	4454	4537	6640	15653
female sex differentiation	6493	3758	1829	3573	15653
thymocyte apoptotic process	6713	1496	4610	2836	15655
hepatocyte differentiation	3599	4984	2021	5053	15657
osteoclast proliferation	2913	3286	3570	5889	15658
transcytosis	6221	168	2469	6803	15661
ganglion development	2051	9204	1181	3226	15662
cellular response to steroid hormone stimulus	5219	5105	4253	1091	15668
clathrin coat assembly	3034	1696	2987	7957	15674
collateral sprouting in absence of injury	6964	2464	593	5653	15674
regulation of cardiac muscle cell apoptotic process	3678	6172	1312	4513	15675
CD8-positive, alpha-beta T cell differentiation	6143	2246	6528	760	15677
multicellular organism growth	1612	2231	6105	5733	15681
adrenergic receptor signaling pathway	3994	2754	4625	4313	15686
sulfur compound catabolic process	3030	8073	1549	3046	15698
positive regulation of CD8-positive, alpha-beta T cell differentiation	5730	3325	5623	1023	15701
positive regulation of supramolecular fiber organization	4462	2440	7380	1423	15705
blood circulation	3649	2977	6977	2104	15707
regulation of lymphocyte proliferation	3485	2769	6991	2472	15717
high-density lipoprotein particle clearance	3692	4077	4588	3360	15717
mammillary body development	556	13371	1082	713	15722
DNA dealkylation involved in DNA repair	6816	2496	776	5634	15722
regulation of cardiac muscle cell membrane repolarization	7729	1304	2552	4137	15722
regulation of peptidyl-serine phosphorylation	4318	249	7023	4134	15724
organic hydroxy compound transport	5172	2164	6545	1844	15725
behavioral response to pain	6208	2810	6541	166	15725
positive regulation of necrotic cell death	7752	415	4526	3032	15725
thyroid hormone generation	5506	3061	3416	3745	15728
regulation of response to external stimulus	8259	3524	2774	1171	15728
antigen processing and presentation of endogenous peptide antigen via MHC class Ib	1953	10628	3098	65	15744
atrioventricular valve formation	225	10369	4942	210	15746
response to histamine	2364	9334	2768	1281	15747
regulation of alcohol biosynthetic process	4231	5667	2315	3536	15749
extracellular exosome biogenesis	687	2286	4553	8227	15753
parallel actin filament bundle assembly	845	1482	7316	6123	15766
negative regulation of protein phosphorylation	2186	531	9695	3358	15770
organ induction	7221	7449	217	895	15782
lymph vessel development	6827	2564	1803	4592	15786
cellular response to estradiol stimulus	3892	454	9459	1985	15790
negative regulation of homotypic cell-cell adhesion	1872	1021	4975	7924	15792
synaptic vesicle exocytosis	7446	734	5211	2404	15795
blood coagulation	7629	998	2598	4572	15797
maintenance of location in cell	548	6251	8814	186	15799
negative regulation of lyase activity	2604	506	5397	7295	15802
determination of dorsal identity	6363	6031	2318	1090	15802
myelination in peripheral nervous system	4178	519	5919	5199	15815
negative regulation of platelet-derived growth factor receptor signaling pathway	879	1066	6378	7494	15817
positive regulation of MAP kinase activity	8666	1616	5004	532	15818
peripheral nervous system axon ensheathment	4179	520	5920	5200	15819
negative regulation of inclusion body assembly	8181	2947	3114	1580	15822
neuronal action potential	641	5127	7097	2958	15823
formation of primary germ layer	8868	1150	1903	3902	15823
regulation of antigen receptor-mediated signaling pathway	3014	3871	7282	1657	15824
immune response-regulating cell surface receptor signaling pathway	8078	1812	5165	777	15832
axis specification	6472	5703	501	3164	15840
nephron tubule formation	4623	4610	6385	228	15846
modulation of age-related behavioral decline	4564	1608	3856	5819	15847
ventricular cardiac muscle cell action potential	6907	7513	1146	281	15847
telencephalon glial cell migration	8178	739	2691	4239	15847
positive regulation of insulin secretion	6718	4228	3281	1621	15848
regulation of amyloid fibril formation	797	2967	8168	3922	15854
positive regulation of interleukin-4 production	337	3768	6716	5034	15855
positive regulation of cell development	1829	2709	6062	5255	15855
membrane disassembly	3330	2212	3175	7141	15858
regulation of atrial cardiac muscle cell membrane depolarization	7202	2513	3685	2458	15858
male gamete generation	3198	7141	3699	1824	15862
morphogenesis of a branching structure	6256	1681	4758	3169	15864
actin filament organization	2017	556	5978	7320	15871
somite specification	5128	7983	1740	1027	15878
heart formation	4415	9648	134	1683	15880
positive regulation of Fc-gamma receptor signaling pathway involved in phagocytosis	5707	2183	4643	3355	15888
regulation of striated muscle contraction	3999	7335	1352	3203	15889
regulation of polarized epithelial cell differentiation	3722	6549	3208	2413	15892
circadian behavior	1931	5984	1832	6164	15911
regulation of canonical Wnt signaling pathway	1251	8610	3704	2347	15912
olfactory bulb development	1777	10375	1474	2286	15912
inorganic anion transmembrane transport	4371	5332	5071	1138	15912
ovulation cycle process	2627	5385	6164	1737	15913
myofibril assembly	7543	1240	2656	4497	15936
trans-synaptic signaling by lipid	778	8721	788	5651	15938
trans-synaptic signaling by endocannabinoid	779	8722	789	5652	15942
positive regulation of cell projection organization	1838	1708	7238	5159	15943
positive regulation of branching involved in ureteric bud morphogenesis	5037	6824	1992	2091	15944
glycolytic process through fructose-6-phosphate	1746	7653	823	5736	15958
demethylation	4646	3283	2306	5723	15958
SREBP signaling pathway	502	7893	2235	5329	15959
positive regulation of intracellular estrogen receptor signaling pathway	1752	10178	624	3405	15959
polyamine transport	2513	8986	2950	1511	15960
serotonin uptake	8174	5479	2114	198	15965
corpus callosum development	6787	1349	6975	866	15977
L-cysteine metabolic process	4420	7412	822	3329	15983
negative regulation of oxidoreductase activity	5359	883	3755	5992	15989
positive regulation of protein kinase C signaling	5174	1063	5749	4004	15990
protein catabolic process in the vacuole	1	5330	2794	7867	15992
regulation of regulated secretory pathway	7015	2049	6132	798	15994
negative regulation of anion transport	6272	619	4510	4606	16007
negative regulation of relaxation of cardiac muscle	329	1419	4075	10186	16009
glial cell apoptotic process	4999	4040	3244	3728	16011
neurotrophin signaling pathway	5431	89	9146	1347	16013
neuroblast division	1982	2099	4296	7638	16015
positive regulation of cytosolic calcium ion concentration involved in phospholipase C-activating G protein-coupled signaling pathway	4830	1788	8764	637	16019
positive regulation of morphogenesis of an epithelium	4898	6482	961	3680	16021
response to hyperoxia	1389	9853	2446	2336	16024
spindle localization	3527	3387	2867	6244	16025
optic cup morphogenesis involved in camera-type eye development	3843	5587	64	6537	16031
ornithine metabolic process	2470	5352	2882	5330	16034
positive regulation of exocytosis	5383	3381	5168	2102	16034
Toll signaling pathway	2328	1989	6477	5246	16040
amino acid import	1503	9093	4691	756	16043
phagolysosome assembly	3776	3589	3913	4768	16046
commitment of neuronal cell to specific neuron type in forebrain	4009	8047	449	3545	16050
positive regulation of lamellipodium organization	489	3199	9209	3158	16055
cell differentiation in hindbrain	4526	6089	199	5242	16056
excretion	5890	2349	2925	4898	16062
directional guidance of interneurons involved in migration from the subpallium to the cortex	11102	1355	440	3174	16071
positive regulation of the force of heart contraction	2393	9614	2540	1526	16073
regulation of mesenchymal cell apoptotic process	5639	4531	1232	4673	16075
chemorepulsion involved in interneuron migration from the subpallium to the cortex	11103	1356	441	3175	16075
microglia differentiation	5859	3688	1958	4574	16079
positive regulation of homotypic cell-cell adhesion	153	367	8431	7129	16080
positive regulation of B cell activation	2447	2407	4363	6871	16088
regulation of mitochondrial membrane potential	700	1055	6270	8064	16089
filopodium assembly	1292	5390	5200	4207	16089
gamma-aminobutyric acid secretion	3774	2530	3803	5983	16090
response to growth hormone	5932	424	1093	8649	16098
chondroitin sulfate biosynthetic process	2896	3069	6109	4035	16109
canonical Wnt signaling pathway involved in midbrain dopaminergic neuron differentiation	4503	2338	5241	4034	16116
response to external stimulus	8350	616	6949	201	16116
response to growth factor	4401	1418	5158	5141	16118
negative regulation of transcription of nucleolar large rRNA by RNA polymerase I	4586	6594	1134	3805	16119
chordate embryonic development	540	6106	2464	7016	16126
phagosome maturation	962	7386	2980	4798	16126
enamel mineralization	8344	2394	3450	1938	16126
regulation of lymphangiogenesis	1704	4373	5642	4409	16128
neutrophil activation involved in immune response	6180	247	5756	3961	16144
regulation of aspartic-type peptidase activity	6456	693	1506	7491	16146
positive regulation of cellular component movement	5503	1490	3628	5526	16147
oviduct development	2124	7129	6626	270	16149
relaxation of smooth muscle	2087	2062	8157	3847	16153
cellular response to low-density lipoprotein particle stimulus	4233	1511	3918	6491	16153
recognition of apoptotic cell	279	4853	6002	5027	16161
regulation of filopodium assembly	313	5333	4626	5891	16163
positive regulation of protein depolymerization	5182	5852	3500	1630	16164
establishment of spindle localization	2533	3292	4641	5702	16168
microvillus organization	1639	1756	9505	3275	16175
arginine catabolic process	5507	4624	5675	369	16175
cochlea development	5446	8074	714	1945	16179
positive regulation of neuron projection development	7112	967	5367	2740	16186
cellular response to light stimulus	5101	1365	2698	7041	16205
cranial skeletal system development	3956	8090	929	3231	16206
establishment of endothelial barrier	3072	7915	878	4349	16214
dendritic spine maintenance	3728	2120	8173	2193	16214
negative regulation of T cell activation	2283	4580	2770	6585	16218
connective tissue development	5075	7695	369	3081	16220
cellular response to histamine	4147	8165	1346	2569	16227
catecholamine metabolic process	4365	4988	2817	4057	16227
negative regulation of protein modification process	952	762	9661	4854	16229
catechol-containing compound metabolic process	4366	4989	2818	4058	16231
negative regulation of mesodermal cell fate specification	3070	6116	4081	2967	16234
paranodal junction assembly	6688	3854	508	5184	16234
regulation of stem cell division	483	4074	8043	3635	16235
negative regulation of mesodermal cell differentiation	3071	6117	4082	2968	16238
suckling behavior	1715	1813	1956	10758	16242
response to bacterial lipopeptide	4907	2307	4926	4104	16244
cellular response to bacterial lipoprotein	4908	2308	4927	4105	16248
cardiac pacemaker cell differentiation	12376	2226	583	1063	16248
positive regulation of cardiac muscle contraction	6562	1366	2923	5398	16249
regulation of actin filament bundle assembly	637	5265	5466	4882	16250
cellular response to bacterial lipopeptide	4909	2309	4928	4106	16252
regulation of circadian sleep/wake cycle	2467	9023	1353	3411	16254
atrioventricular node development	4248	6640	1911	3456	16255
regulation of response to extracellular stimulus	8434	74	1103	6651	16262
negative regulation of mitochondrial membrane potential	4836	2764	5106	3557	16263
regulation of response to nutrient levels	8435	75	1104	6652	16266
Golgi to plasma membrane transport	62	1769	6474	7962	16267
positive regulation of cell-cell adhesion	2569	5380	6741	1588	16278
regulation of nephron tubule epithelial cell differentiation	3142	8572	3873	692	16279
polyol metabolic process	4052	1391	8305	2532	16280
regulation of myelination	2056	3350	9588	1293	16287
Schwann cell proliferation	1470	3460	111	11254	16295
regulation of mononuclear cell proliferation	3689	2919	7130	2563	16301
retinal cell apoptotic process	6775	812	6778	1936	16301
regulation of amino acid transport	5664	1462	6014	3162	16302
embryonic camera-type eye morphogenesis	4581	4491	9	7225	16306
morphogenesis of an epithelium	1758	5848	2275	6426	16307
regulation of p38MAPK cascade	4657	3113	4157	4383	16310
positive regulation of substrate adhesion-dependent cell spreading	6476	3579	5094	1165	16314
regulation of cytoplasmic transport	384	8424	6601	920	16329
cellular monovalent inorganic anion homeostasis	896	5215	4045	6176	16332
positive regulation of stem cell population maintenance	1645	8809	4947	931	16332
response to wounding	9432	950	1437	4518	16337
regulation of tooth mineralization	4301	1217	7515	3310	16343
mesoderm development	6866	1890	1841	5752	16349
positive regulation of lyase activity	6065	1339	6593	2358	16355
regulation of axon extension involved in axon guidance	3640	2197	2727	7793	16357
nose morphogenesis	976	3228	114	12042	16360
coagulation	7815	942	2807	4811	16375
positive regulation of CD8-positive, alpha-beta T cell activation	3258	5683	7295	147	16383
antigen processing and presentation of endogenous peptide antigen	5354	9774	1125	130	16383
negative regulation of cardiac muscle tissue growth	2310	2148	9199	2734	16391
actin cytoskeleton organization	2136	205	5824	8230	16395
negative regulation of heart growth	2311	2149	9200	2735	16395
regulation of brain-derived neurotrophic factor receptor signaling pathway	693	6927	4888	3895	16403
regulation of aspartic-type endopeptidase activity involved in amyloid precursor protein catabolic process	5871	354	2984	7194	16403
positive regulation of membrane depolarization	7936	3031	2178	3258	16403
metaphase/anaphase transition of mitotic cell cycle	3279	7276	3970	1894	16419
positive regulation of excitatory postsynaptic potential	6163	2485	1689	6084	16421
atrioventricular valve development	1166	8787	5804	666	16423
esophagus smooth muscle contraction	3699	6606	3461	2657	16423
response to estradiol	4139	5513	5552	1219	16423
cardioblast differentiation	4230	10937	635	621	16423
ganglioside biosynthetic process	3253	1859	3256	8057	16425
animal organ regeneration	5389	2962	3948	4128	16427
endothelial cell-cell adhesion	4693	2545	5132	4059	16429
positive regulation of intracellular steroid hormone receptor signaling pathway	941	9895	1212	4384	16432
regulation of myotube differentiation	1587	1430	8461	4956	16434
regulation of stress fiber assembly	1194	5944	6767	2535	16440
embryonic pattern specification	3577	7005	4122	1738	16442
regulation of planar cell polarity pathway involved in axis elongation	3335	6058	3944	3107	16444
positive regulation of synapse maturation	5145	6534	741	4026	16446
regulation of lamellipodium assembly	705	3229	8734	3779	16447
negative regulation of planar cell polarity pathway involved in axis elongation	3336	6059	3945	3108	16448
signal transduction involved in regulation of gene expression	5972	7791	384	2303	16450
pattern specification involved in metanephros development	3244	5450	4401	3356	16451
negative regulation of cell fate specification	5064	8370	1969	1054	16457
catecholamine secretion	5545	449	6960	3505	16459
extracellular regulation of signal transduction	8586	120	3233	4521	16460
mesenchymal to epithelial transition involved in metanephros morphogenesis	8670	3302	4430	58	16460
positive regulation of lipid catabolic process	2585	927	7343	5608	16463
regulation of protein kinase C activity	13131	1986	854	492	16463
extracellular negative regulation of signal transduction	8587	121	3234	4522	16464
dopamine secretion	6751	268	7632	1815	16466
positive regulation of protein kinase C activity	13132	1987	855	493	16467
ammonium transmembrane transport	217	9024	4301	2926	16468
regulation of dopamine secretion	6752	269	7633	1816	16470
multicellular organismal reproductive process	5402	4512	4829	1729	16472
inorganic anion transport	4946	2936	7751	840	16473
negative regulation of neuron projection regeneration	5640	5475	1463	3898	16476
arginine metabolic process	3027	6184	5708	1563	16482
xenobiotic transport	2754	5416	2200	6127	16497
positive regulation of sodium ion transport	3402	2546	4173	6396	16517
contact inhibition	347	1982	1747	12444	16520
regulation of cardiac muscle tissue development	4661	3219	4941	3700	16521
postsynapse to nucleus signaling pathway	7972	5542	2074	934	16522
hemostasis	7954	1340	3043	4193	16530
regulation of protein polyubiquitination	2776	1424	5293	7040	16533
response to dietary excess	6104	339	8140	1953	16536
negative regulation of response to biotic stimulus	6707	3480	3031	3319	16537
collagen fibril organization	2099	9027	4638	775	16539
cell volume homeostasis	3128	3317	5362	4736	16543
coenzyme A transport	92	4439	2717	9301	16549
coenzyme A transmembrane transport	93	4440	2718	9302	16553
soft palate development	197	8994	2295	5068	16554
adenosine 3',5'-bisphosphate transmembrane transport	94	4441	2719	9303	16557
regulation of response to food	6864	82	4509	5108	16563
metanephric epithelium development	9387	5816	1086	275	16564
calcium-mediated signaling using extracellular calcium source	4821	2885	4870	3992	16568
negative regulation of biomineral tissue development	4984	5360	5946	283	16573
oligodendrocyte development	2623	6703	6987	262	16575
Rho protein signal transduction	5849	1855	2554	6324	16582
cell proliferation in hindbrain	5	8598	6124	1873	16600
inner ear auditory receptor cell differentiation	1659	5331	2172	7446	16608
astrocyte activation	780	3719	6910	5201	16610
regulation of transcription from RNA polymerase II promoter involved in heart development	1239	9108	2389	3880	16616
atrial cardiac muscle cell membrane repolarization	4933	4734	5545	1405	16617
regulation of leukocyte mediated cytotoxicity	7735	3337	5446	104	16622
T cell receptor signaling pathway	8445	1426	4236	2517	16624
regulation of genetic imprinting	3968	5083	4473	3110	16634
leukocyte apoptotic process	8022	2466	3384	2764	16636
sarcosine catabolic process	1748	3655	10106	1128	16637
mammillary axonal complex development	557	14284	1083	714	16638
positive regulation of dopamine secretion	6818	51	3775	5994	16638
clustering of voltage-gated potassium channels	4888	2723	5009	4021	16641
muscle tissue morphogenesis	6952	1394	2313	5984	16643
calcium-mediated signaling	8038	1242	6261	1103	16644
nuclear envelope organization	1099	4410	4091	7047	16647
phasic smooth muscle contraction	2876	6833	6227	711	16647
synaptonemal complex organization	5998	6415	4144	90	16647
neutrophil chemotaxis	4140	830	6654	5026	16650
axon midline choice point recognition	6753	5239	2853	1805	16650
interleukin-21 production	4029	4259	4403	3965	16656
stem cell division	3477	3376	6202	3604	16659
positive regulation of chromosome separation	4786	6245	2724	2914	16669
regulation of postsynaptic neurotransmitter receptor activity	1320	7050	4017	4284	16671
regulation of morphogenesis of an epithelium	6950	4907	2985	1830	16672
dendritic spine organization	3904	372	6644	5753	16673
neuron projection organization	2290	409	7503	6474	16676
regulation of actomyosin structure organization	2210	4193	6784	3492	16679
regulation of actin filament-based movement	862	9694	295	5831	16682
modification of postsynaptic structure	2834	6650	1244	5954	16682
luteinizing hormone signaling pathway	11703	2336	1559	1085	16683
exocytic insertion of neurotransmitter receptor to postsynaptic membrane	5771	5307	1476	4131	16685
regulation of endothelial cell chemotaxis	2324	5454	1530	7379	16687
positive regulation of hippo signaling	2936	5482	6605	1667	16690
cardiac muscle cell development	7521	38	2635	6502	16696
cerebral cortex regionalization	6780	829	3291	5799	16699
cerebral cortex development	6896	1498	1554	6751	16699
positive regulation of cytokine production	7505	1049	7445	701	16700
positive regulation of transport	7481	1525	7062	633	16701
vesicle-mediated transport to the plasma membrane	569	3766	4937	7434	16706
cerebral cortex cell migration	7456	1657	1126	6468	16707
antigen processing and presentation of endogenous peptide antigen via MHC class I via ER pathway	2145	10340	4219	4	16708
facial nerve structural organization	4987	1999	2664	7060	16710
oculomotor nerve development	3899	343	1024	11445	16711
antigen processing and presentation of endogenous peptide antigen via MHC class I via ER pathway, TAP-independent	2146	10341	4220	5	16712
chondroitin sulfate proteoglycan biosynthetic process	2509	3562	7456	3187	16714
positive regulation of spindle checkpoint	1628	8608	1866	4620	16722
cardiac ventricle morphogenesis	1676	4837	2585	7624	16722
positive regulation of mitotic cell cycle spindle assembly checkpoint	1629	8609	1867	4621	16726
L-phenylalanine catabolic process	6414	4357	1645	4311	16727
developmental pigmentation	131	2515	8207	5875	16728
response to interferon-beta	9157	382	3443	3747	16729
cell communication by electrical coupling involved in cardiac conduction	3546	8770	473	3942	16731
glutamine family amino acid catabolic process	5824	6112	4003	793	16732
erythrose 4-phosphate/phosphoenolpyruvate family amino acid catabolic process	6415	4359	1646	4312	16732
response to sodium arsenite	5741	8658	2131	207	16737
sphingolipid biosynthetic process	6900	1013	6097	2730	16740
negative regulation of metaphase/anaphase transition of cell cycle	1734	8617	5711	679	16741
negative regulation of cell morphogenesis involved in differentiation	1545	1223	6509	7468	16745
negative regulation of catabolic process	84	2044	9024	5595	16747
nucleoside bisphosphate biosynthetic process	386	3753	4467	8147	16753
ribonucleoside bisphosphate biosynthetic process	387	3754	4468	8148	16757
regulation of sodium ion transmembrane transporter activity	824	4889	3372	7675	16760
purine nucleoside bisphosphate biosynthetic process	388	3755	4469	8149	16761
cellular response to growth factor stimulus	4712	1529	6047	4475	16763
cellular defense response	8846	1165	2819	3935	16765
response to food	2575	118	8748	5332	16773
positive regulation of metanephros development	3499	6258	3928	3093	16778
generation of catalytic spliceosome for second transesterification step	1544	12731	2420	86	16781
negative regulation of innate immune response	4395	10916	859	611	16781
protein localization to chromatin	9102	1678	2415	3589	16784
B cell homeostasis	2596	1768	6326	6100	16790
auditory receptor cell fate specification	1703	3114	2443	9532	16792
second-messenger-mediated signaling	7973	197	7396	1234	16800
amyloid fibril formation	938	676	7715	7473	16802
lymphocyte homeostasis	1417	1852	7968	5570	16807
regulation of ion transmembrane transporter activity	4501	371	4210	7727	16809
nucleoside diphosphate phosphorylation	2150	7221	422	7021	16814
regulation of spontaneous synaptic transmission	973	2235	7439	6168	16815
metaphase/anaphase transition of cell cycle	4039	7714	4713	356	16822
cellular response to amyloid-beta	220	1476	8474	6654	16824
actin filament-based transport	1730	4991	2948	7157	16826
ureter morphogenesis	2716	9661	1480	2974	16831
peptidyl-arginine methylation	1066	4886	6397	4484	16833
central nervous system neuron development	4202	7088	5143	400	16833
positive regulation of natural killer cell mediated immune response to tumor cell	10338	631	5129	741	16839
axonal transport of mitochondrion	979	4947	3018	7897	16841
immunological synapse formation	3738	2561	5968	4575	16842
cardiac muscle cell differentiation	6949	86	3532	6284	16851
positive regulation of kinase activity	7352	567	5933	3004	16856
polyamine transmembrane transport	1567	8715	2077	4498	16857
negative regulation of meiotic cell cycle	4149	3554	8861	295	16859
surfactant homeostasis	487	4736	4876	6770	16869
regulation of stem cell population maintenance	4778	5349	5520	1222	16869
digestive tract development	464	6879	6515	3012	16870
antigen processing and presentation of peptide antigen via MHC class Ib	2468	10699	3610	107	16884
regulation of thrombin-activated receptor signaling pathway	4306	7323	4728	533	16890
basic amino acid transmembrane transport	1294	7421	3605	4573	16893
follicular B cell differentiation	4470	4071	4642	3710	16893
preganglionic parasympathetic fiber development	5834	248	2465	8346	16893
negative regulation of thrombin-activated receptor signaling pathway	4307	7324	4729	534	16894
phosphatidylcholine metabolic process	251	6697	3584	6368	16900
macrophage activation	4582	3037	6504	2777	16900
regulation of cell fate specification	8626	5707	13	2562	16908
motor neuron migration	7049	6712	879	2270	16910
biomineral tissue development	3846	4698	4868	3499	16911
regulation of insulin-like growth factor receptor signaling pathway	7663	4697	3818	740	16918
anion homeostasis	428	2541	7455	6501	16925
negative regulation of mitochondrial fusion	4235	4788	1609	6296	16928
regulation of potassium ion import	3700	245	7118	5868	16931
negative regulation of cell adhesion	1648	1789	6405	7096	16938
negative regulation of chemotaxis	3380	4805	3935	4820	16940
sequestering of TGFbeta in extracellular matrix	11499	156	308	4983	16946
dendritic cell differentiation	6945	7098	1303	1602	16948
response to folic acid	6682	3584	934	5756	16956
regulation of leukocyte proliferation	4815	3135	6580	2428	16958
response to salt	3896	8293	2201	2573	16963
membrane repolarization during atrial cardiac muscle cell action potential	2461	9007	3305	2192	16965
regulation of localization	4466	510	5947	6048	16971
positive regulation of cell adhesion	3884	3545	6983	2560	16972
primary amino compound metabolic process	2669	1543	5744	7020	16976
ammonia assimilation cycle	9900	4145	1695	1238	16978
regulation of excretion	3566	8121	980	4318	16985
regulation of renal system process	4835	6693	2457	3002	16987
lens fiber cell differentiation	6374	965	3678	5971	16988
platelet aggregation	836	2153	7397	6603	16989
regulation of muscle contraction	5334	4811	2926	3918	16989
glial cell-derived neurotrophic factor receptor signaling pathway	2079	5684	5395	3834	16992
amyloid precursor protein catabolic process	5709	1952	5716	3619	16996
body morphogenesis	1364	7285	59	8294	17002
regulation of cAMP-mediated signaling	7677	150	890	8287	17004
negative regulation of transcription by RNA polymerase II	1120	2796	6951	6139	17006
regulation of cell-substrate adhesion	3354	1985	7482	4187	17008
pronephric nephron tubule development	198	5994	223	10611	17026
multicellular organism reproduction	5292	5034	5124	1576	17026
protein polyglutamylation	8473	1006	797	6750	17026
pronephros morphogenesis	199	5995	224	10612	17030
hair cell differentiation	620	7154	1016	8240	17030
negative regulation of blood pressure	3394	7207	5347	1086	17034
positive regulation of interferon-gamma production	7811	2339	4136	2749	17035
adult heart development	5260	2446	2510	6820	17036
JNK cascade	3672	780	5949	6636	17037
regulation of vascular endothelial growth factor production	1307	7623	6446	1666	17042
regulation of protein maturation	892	4880	7186	4091	17049
sequestering of extracellular ligand from receptor	11497	140	2025	3388	17050
oxaloacetate transport	4673	3912	4846	3621	17052
positive regulation of germinal center formation	10302	4235	1473	1042	17052
protein localization to cytosolic proteasome complex	2938	754	3413	9949	17054
neurotransmitter biosynthetic process	3041	7249	100	6665	17055
positive regulation of peptidyl-threonine phosphorylation	1133	6423	1625	7875	17056
protein localization to cytosolic proteasome complex involved in ERAD pathway	2939	755	3414	9950	17058
definitive hemopoiesis	1787	5786	4584	4904	17061
hematopoietic stem cell proliferation	3384	9296	918	3468	17066
cellular response to organic cyclic compound	3505	8017	2587	2957	17066
negative regulation of post-translational protein modification	1811	5964	145	9148	17068
intracellular estrogen receptor signaling pathway	2106	7042	4307	3627	17082
regulation of lamellipodium organization	660	3641	9178	3608	17087
regulation of protein processing	1329	5404	6766	3591	17090
negative regulation of protein localization to cell surface	8403	2980	2324	3396	17103
negative regulation of CD4-positive, alpha-beta T cell activation	4943	1821	8638	1704	17106
midbrain-hindbrain boundary development	6190	8179	745	1996	17110
spermatogenesis	3644	6333	3196	3938	17111
negative regulation of chemokine-mediated signaling pathway	3424	818	6984	5890	17116
protein targeting to vacuole involved in autophagy	804	7437	4936	3943	17120
organelle membrane fusion	6079	1685	4440	4919	17123
regulation of body fluid levels	9173	522	532	6896	17123
mesenchymal to epithelial transition	8313	3472	5296	49	17130
apoptotic process involved in blood vessel morphogenesis	5460	1660	5577	4437	17134
postsynaptic membrane organization	7269	2943	372	6550	17134
positive regulation of potassium ion transmembrane transporter activity	8762	5621	1478	1279	17140
regulation of neurotransmitter secretion	3652	1107	8058	4330	17147
determination of dorsal/ventral asymmetry	6667	6510	2655	1317	17149
negative regulation of JNK cascade	2729	4566	7807	2058	17160
mitotic sister chromatid separation	4099	7313	3294	2454	17160
regulation of cellular response to growth factor stimulus	4889	6162	3733	2378	17162
hindbrain development	3858	1799	3568	7938	17163
myosin filament organization	5604	1133	5799	4637	17173
regulation of dendrite development	9207	110	2895	4967	17179
asymmetric cell division	1609	10183	865	4523	17180
embryonic hemopoiesis	3196	63	5501	8428	17188
negative regulation of interferon-alpha production	11285	3561	1379	963	17188
regulation of sister chromatid segregation	3665	9638	3210	676	17189
negative regulation of actin filament bundle assembly	110	8342	3850	4897	17199
negative regulation of epidermis development	427	8844	840	7090	17201
regulation of actin filament-based process	3190	2107	3866	8038	17201
intracellular receptor signaling pathway	5394	4617	4731	2459	17201
positive regulation of neuron differentiation	7600	557	1783	7264	17204
nitrogen utilization	11049	746	4776	635	17206
cerebellar Purkinje cell layer formation	1090	10526	1169	4433	17218
negative regulation of mitotic metaphase/anaphase transition	1281	8473	5141	2327	17222
negative regulation of organ growth	3438	1837	9110	2842	17227
regulation of intracellular sterol transport	3223	3867	3942	6201	17233
neuron projection extension	4497	705	5667	6365	17234
regulation of intracellular cholesterol transport	3224	3868	3943	6202	17237
positive regulation of myoblast differentiation	5842	6477	3347	1573	17239
NADH regeneration	934	7351	1391	7566	17242
magnesium ion transport	429	4614	4607	7594	17244
cellular response to sterol depletion	668	8415	2611	5550	17244
canonical glycolysis	935	7352	1392	7567	17246
glucose catabolic process to pyruvate	936	7353	1393	7568	17250
positive regulation of fatty acid metabolic process	2011	4732	6569	3941	17253
cerebellum development	1959	4391	3679	7234	17263
regulation of transmembrane transporter activity	4123	373	5330	7437	17263
regulation of calcium ion-dependent exocytosis	8635	1580	5053	2002	17270
cell migration involved in gastrulation	290	10533	1628	4833	17284
negative regulation of respiratory burst	4157	8356	1136	3644	17293
regulation of smoothened signaling pathway	7252	4954	2896	2194	17296
neural tube development	837	10272	222	5968	17299
cardiocyte differentiation	6543	484	2699	7573	17299
photoreceptor cell outer segment organization	2742	8349	2381	3831	17303
cardiac chamber formation	768	7191	1755	7593	17307
loop of Henle development	3961	2077	7992	3280	17310
negative regulation of gliogenesis	4449	8867	881	3114	17311
synaptic signaling by nitric oxide	3889	6591	4008	2826	17314
protein localization to vacuole	1532	2405	4690	8688	17315
polyamine catabolic process	3869	1392	11691	363	17315
trans-synaptic signaling by soluble gas	3890	6592	4009	2827	17318
trans-synaptic signaling by nitric oxide	3891	6593	4010	2828	17322
positive regulation of transcription regulatory region DNA binding	1642	9535	1343	4805	17325
axon choice point recognition	3685	7009	4007	2625	17326
skin development	3832	10407	2471	627	17337
canonical Wnt signaling pathway involved in positive regulation of endothelial cell migration	1772	3689	10571	1307	17339
cerebral cortex GABAergic interneuron migration	413	4632	12239	56	17340
morphogenesis of an epithelial fold	5453	5022	987	5878	17340
canonical Wnt signaling pathway involved in positive regulation of cell-cell adhesion	1773	3690	10572	1308	17343
inhibitory synapse assembly	7285	4381	5	5672	17343
extracellular vesicle biogenesis	953	2945	5128	8321	17347
canonical Wnt signaling pathway involved in positive regulation of wound healing	1774	3691	10573	1309	17347
response to nickel cation	1897	3942	9792	1716	17347
fructose 2,6-bisphosphate metabolic process	107	7868	5251	4125	17351
pyruvate metabolic process	1183	8972	646	6552	17353
actin filament bundle assembly	125	4960	6184	6097	17366
negative regulation of transmembrane receptor protein serine/threonine kinase signaling pathway	6553	2188	3486	5142	17369
paraxial mesoderm formation	3084	6930	1203	6156	17373
negative regulation of purine nucleotide metabolic process	1926	7069	6352	2027	17374
dendritic cell chemotaxis	4594	6069	511	6203	17377
regulation of non-canonical Wnt signaling pathway	8535	3220	5538	88	17381
paraxial mesoderm morphogenesis	5407	6673	988	4320	17388
response to sterol depletion	331	9433	1512	6113	17389
blastocyst formation	2244	3055	6506	5594	17399
aortic valve morphogenesis	2611	8472	5998	321	17402
epithelial cell development	5056	6915	331	5101	17403
response to nutrient levels	2880	672	7788	6065	17405
negative regulation of autophagosome assembly	142	4149	5988	7128	17407
regulation of mitotic sister chromatid segregation	2181	8880	3069	3287	17417
phosphatidylcholine acyl-chain remodeling	214	7389	5767	4049	17419
oculomotor nerve morphogenesis	2708	596	3657	10458	17419
release of cytochrome c from mitochondria	4561	1126	8972	2762	17421
oculomotor nerve formation	2709	597	3658	10459	17423
positive regulation of sequestering of triglyceride	2115	3216	6682	5411	17424
negative regulation of endoplasmic reticulum calcium ion concentration	6785	1964	6824	1851	17424
regulation of organ growth	604	2652	7191	6980	17427
protein localization to cell surface	7291	2379	426	7338	17434
SMAD protein signal transduction	7772	383	2681	6601	17437
regulation of amyloid precursor protein catabolic process	8352	1383	4582	3121	17438
positive regulation of protein localization to cell periphery	1494	3958	6011	5980	17443
common myeloid progenitor cell proliferation	5917	8803	2679	45	17444
negative regulation of chromosome segregation	2037	8634	5990	785	17446
positive regulation of leukocyte tethering or rolling	7003	1357	3370	5716	17446
negative regulation of viral process	9006	753	3773	3921	17453
positive regulation of acute inflammatory response	4151	9074	3068	1164	17457
putrescine metabolic process	2114	3566	6550	5230	17460
actin filament bundle organization	181	4916	6632	5732	17461
Schwann cell differentiation	3877	1241	8204	4147	17469
gamete generation	4093	6181	5046	2150	17470
glial cell fate commitment	8156	4518	364	4434	17472
negative regulation of cell growth involved in cardiac muscle cell development	1521	2053	7606	6295	17475
mammary gland epithelium development	3601	8394	602	4879	17476
positive regulation of lipid metabolic process	1432	1895	5717	8436	17480
regulation of bone development	1922	4548	6066	4948	17484
galanin-activated signaling pathway	12914	1941	1578	1057	17490
organophosphate ester transport	722	3160	6570	7042	17494
middle ear morphogenesis	4659	7737	762	4336	17494
regulation of positive chemotaxis	12098	1071	3651	674	17494
negative regulation of muscle contraction	808	8699	6887	1111	17505
fructose transmembrane transport	4699	7360	4804	644	17507
negative regulation of mRNA catabolic process	1044	7477	4240	4747	17508
regulation of branching involved in prostate gland morphogenesis	6259	2908	6642	1705	17514
cerebral cortex radially oriented cell migration	9051	359	2010	6096	17516
regulation of cysteine-type endopeptidase activity	9184	3257	4324	753	17518
positive regulation of neutrophil extravasation	5443	3275	4834	3967	17519
3'-UTR-mediated mRNA destabilization	1690	10228	5234	382	17534
olfactory lobe development	2308	10493	2027	2706	17534
metanephric glomerulus development	4409	10355	1313	1458	17535
regulation of intracellular steroid hormone receptor signaling pathway	623	9039	5469	2408	17539
lymph vessel morphogenesis	4761	4390	1408	6982	17541
positive regulation of calcium ion import	5681	4577	746	6541	17545
ectoderm and mesoderm interaction	1786	3748	1484	10534	17552
positive regulation of peptidyl-serine phosphorylation	6939	426	4497	5690	17552
protein dephosphorylation	6384	798	4457	5914	17553
regulation of metaphase plate congression	7222	6433	1307	2591	17553
heat acclimation	3974	5135	4914	3533	17556
regulation of CD8-positive, alpha-beta T cell differentiation	2624	5572	7056	2306	17558
Golgi to secretory granule transport	123	5067	2995	9375	17560
cellular heat acclimation	3975	5136	4915	3534	17560
response to ionomycin	232	2351	14676	303	17562
mammary gland involution	7104	918	3627	5916	17565
cellular response to ionomycin	233	2352	14677	304	17566
chaperone-mediated autophagy	1517	5854	4768	5429	17568
spermatid differentiation	4811	3742	6869	2147	17569
stress-activated MAPK cascade	3493	2282	6095	5700	17570
detection of biotic stimulus	2480	8774	5057	1269	17580
chloride transport	2409	6641	8397	145	17592
regulation of mitotic sister chromatid separation	3569	7655	4242	2129	17595
negative regulation of organelle organization	1263	5723	8843	1768	17597
response to gonadotropin-releasing hormone	1946	9042	1984	4627	17599
regulation of inflammatory response	2275	10850	3884	591	17600
negative regulation of axon regeneration	7318	6584	785	2913	17600
thioester biosynthetic process	2110	2714	4969	7810	17603
acyl-CoA biosynthetic process	2111	2715	4970	7811	17607
neural crest cell fate specification	1653	3013	2941	10001	17608
liver development	3015	7749	1444	5406	17614
neural retina development	454	7032	2790	7346	17622
regulation of alpha-beta T cell activation	2659	4420	8326	2219	17624
cellular response to fibroblast growth factor stimulus	5148	10387	1663	428	17626
dendrite morphogenesis	5832	61	4780	6961	17634
positive regulation of striated muscle contraction	8494	962	1090	7095	17641
positive regulation of amyloid-beta formation	9170	1687	3265	3522	17644
positive regulation of protein polymerization	4913	2646	7801	2285	17645
metencephalon development	3366	1962	4433	7889	17650
atrioventricular valve morphogenesis	789	9592	6863	411	17655
activation of immune response	6358	3328	7420	550	17656
positive regulation of phospholipid biosynthetic process	7604	2478	1405	6172	17659
regulation of somatic stem cell population maintenance	7861	1183	5090	3525	17659
regulation of neutrophil activation	7529	265	7320	2546	17660
positive regulation of glycogen biosynthetic process	1893	241	7567	7960	17661
cardiac cell development	7463	99	2868	7232	17662
regulation of microvillus organization	1428	1484	12419	2349	17680
endothelial cell differentiation	1842	9040	1557	5245	17684
regulation of metanephros development	6377	6886	2695	1727	17685
glycosphingolipid biosynthetic process	7259	3467	2802	4161	17689
luteinization	3680	6371	1498	6143	17692
protein localization to axon	4177	3201	7566	2748	17692
arginine transmembrane transport	1204	9182	4525	2782	17693
negative regulation of alcohol biosynthetic process	2683	9519	1163	4328	17693
trans-synaptic signaling by lipid, modulating synaptic transmission	3682	6837	4145	3034	17698
transforming growth factor beta activation	8175	1905	695	6923	17698
negative regulation of macrophage activation	1385	7053	6770	2494	17702
trans-synaptic signaling by endocannabinoid, modulating synaptic transmission	3683	6838	4146	3035	17702
neuroinflammatory response	1411	3351	9306	3637	17705
negative regulation of chromosome separation	2038	8902	5991	786	17717
neuroepithelial cell differentiation	5833	6560	479	4845	17717
positive regulation of cytoskeleton organization	6741	1640	7959	1378	17718
glycosylceramide metabolic process	8734	2131	5471	1382	17718
positive regulation of protein autoubiquitination	340	692	3407	13282	17721
cellular response to cAMP	4245	7124	913	5444	17726
negative regulation of epidermal cell differentiation	426	9374	839	7089	17728
regulation of protein serine/threonine phosphatase activity	2613	12462	290	2363	17728
negative regulation of phosphate metabolic process	3360	1264	9593	3511	17728
positive regulation of feeding behavior	7174	3288	1231	6047	17740
L-lysine transport	1929	8352	6225	1245	17751
L-lysine transmembrane transport	1930	8353	6226	1246	17755
regulation of T cell proliferation	6022	4489	5006	2239	17756
negative regulation of monooxygenase activity	6116	5164	1467	5010	17757
protein localization to endoplasmic reticulum exit site	524	2045	2477	12712	17758
regulation of cell morphogenesis	2595	350	6149	8665	17759
endocytic recycling	4971	152	6386	6252	17761
response to BMP	3001	7486	3709	3571	17767
positive regulation of catecholamine secretion	8621	137	4074	4935	17767
cellular response to BMP stimulus	3002	7487	3710	3572	17771
positive regulation of hydrogen peroxide metabolic process	5061	2620	5693	4397	17771
positive regulation of macrophage migration inhibitory factor signaling pathway	1655	3029	2835	10254	17773
regulation of muscle system process	5822	3465	5512	2977	17776
regulation of microvillus assembly	2769	724	12421	1869	17783
negative regulation of neuron migration	4645	6318	415	6405	17783
cell communication	9266	435	5850	2236	17787
maltose metabolic process	3074	934	11277	2506	17791
nucleotide phosphorylation	2444	7639	515	7195	17793
positive regulation of epithelial cell proliferation	8750	4246	495	4304	17795
negative regulation of leukocyte cell-cell adhesion	3446	3821	3661	6868	17796
regulation of synaptic membrane adhesion	4776	2735	5694	4593	17798
axon regeneration	8334	2233	2416	4831	17814
synaptic transmission, GABAergic	8687	4798	1175	3157	17817
viral budding via host ESCRT complex	553	3802	5587	7876	17818
regulation of animal organ morphogenesis	7719	8853	1208	55	17835
circulatory system development	6348	7093	3424	974	17839
dorsal root ganglion development	798	7475	7205	2362	17840
face development	1865	7111	425	8441	17842
cellular response to epinephrine stimulus	6224	3270	6344	2004	17842
phagocytosis	3654	1105	7338	5748	17845
signaling	9297	399	5971	2178	17845
regulation of Rab protein signal transduction	927	4353	6886	5684	17850
positive regulation of transcription by RNA polymerase II	568	9060	2447	5778	17853
brain-derived neurotrophic factor receptor signaling pathway	3252	2424	6699	5483	17858
negative regulation of RNA splicing	6593	3676	2784	4806	17859
anterior/posterior axis specification	9005	7200	260	1394	17859
epidermal cell differentiation	3016	10619	1302	2928	17865
negative regulation of wound healing	8442	660	7145	1622	17869
putrescine biosynthetic process	5093	3120	5449	4208	17870
regulation of DNA methylation	715	9613	4027	3516	17871
positive regulation of cell morphogenesis involved in differentiation	3160	4430	6001	4283	17874
[truncated: 13,114 more rows]
